# Supplementary material
Source: Research Square preprint supplement (doi:10.21203/rs.3.rs-9151930/v1)
Supplement: Supplementary file 1 [file 238eff5fb46a174138a104fc.xlsx]

## Sheet: Index
Contents
Table S1	Discovery and replication cohorts included in the meta-analysis.
Table S2	Description of the imaging data for discovery and replication cohorts.
Table S3	Assessment of inflation and bias in EWAS summary statistics for each cohort.
Table S4	Discovery and replication of FDR-significant CpGs associated with average CT and total SA (hg19 reference genome).
Table S5	Comparisons of FDR-significant CpGs associated with global measures and regional CT and SA measures (frontal, temporal, occipital, parietal, and cingulate cortices) in the discovery meta-analysis.
Table S6	Sensitivity and age-stratified analyses of FDR-significant CpGs associated with global measures in the discovery meta-analysis.
Table S7	Differentially methylated regions (DMRs) associated with average CT and total SA identified using the comb-p Python module (hg19 reference genome).
Table S8	Chromatin state enrichment of CpGs associated with average CT and total SA (P < 1 × 10-5; NCT-associated CpGs = 68; NSA-associated CpGs = 52) across 10 brain tissues, using 15-state chromatin models from the NIH Roadmap Epigenomics Project. Enrichment ratios are calculated using hypergeometric test, with FDR-adjudted P-values computed within each tissue.
Table S9	Histone modification enrichment of CpGs associated with average CT and total SA (P < 1 × 10-5; NCT-associated CpGs = 68; NSA-associated CpGs = 52) across 10 brain tissues. Data included 11 histone marks from the Roadmap Epigenomics Project. Enrichment and significance were calculated using hypergeometric test, with FDR-adjudted P-values computed within each tissue.
Table S10	Pearson correlations between DNA methylation (P < 1 × 10-5) and gene expression across six tissues (brain, colon, kidney, liver, stomach and testis), using EWAS Toolkit (https://ngdc.cncb.ac.cn/ewas/toolkit). Replicated CpGs are in bold; DMR-associated genes are highlighted in grey.
Table S11	KEGG pathway enrichment of genes annotated to CpGs associated with cortical morphology (P < 1 × 10-5), using the MetaBrain platform (https://www.metabrain.nl/).
Table S12	Trait enrichment analysis of CpGs associated with average CT and total SA (P < 1 × 10-5), using EWAS Atlas (https://ngdc.cncb.ac.cn/ewas/atlas/index).
Table S13	Significant CpGs (P < 1 × 10-5) and their prior associations with traits identified through the EWAS Catalog (http://www.ewascatalog.org). Replicated CT-associated CpGs are highlighted in bold.
Table S14	Phenome-wide association study (PheWAS) in the IMAGEN cohort with replicated CT-associated CpGs.
Table S15	Forward Mendelian randomisation (MR) analysis identified putative causal CpGs for average CT and total SA, as well as neurodegenerative and psychiatric disorders and educational attainment.
Table S16	Sensitivity analyses of forward Mendelian randomisation (MR) examining associations between CpGs and: (1) average CT or total SA; (2) neurodegenerative and psychiatric disorders; and (3) educational attainment. Sensitivity analyses were conducted using MR-Egger regression, the weighted median estimator, the simple mode estimator, and the weighted mode estimator, applied only when three or more in…
Table S17	Reverse MR analysis showing putative causal effects of cortical measures, neurodegenerative and psychiatric disorders, and educational attainment on DNAm at CT- or SA-associated CpGs.
Table S18	Cross-tissue concordance of MR-prioritised CpGs between blood and brain.
Table S19	Validation of methylation profile scores for average CT and total SA in relation to cortical measures in the ALSPAC cohort (N = 571).

## Sheet: Table S1
Table S1. Discovery and replication cohorts included in the meta-analysis.
Cohort	Study-design	Array	Ancestry	Total N	N of males	N of patients	Mean age	Age range
Discovery cohorts - European ancestry, with the EPIC array
ADNI	Case-control (Healthy controls, AD, MCI)	EPIC	European	573	315	375	74.6	49.3-94.2
DBIS	Population-based	EPIC	European	770	392	0	45.1	43.5-47.0
ESTRA	Case-control (Healthy controls, AN, BN)	EPIC v2	European	92	0	74	22.4	18.2-26.8
FOR2107Marburg	Case-control (Healthy controls, MDD, BD, SSD)	EPIC	European	409	166	232	37.2	18.0-65.0
FOR2107Münster	Case-control (Healthy controls, MDD, BD, SSD)	EPIC	European	369	128	251	34.2	18.0-65.0
IMAGEN	Population-based	EPIC v2	European	1206	587	0	19.3	17.3-23.0
MCIC	Case-control (Healthy controls, SCZ)	EPIC	European	192	132	89	33.1	18.0-59.0
PPMI	Case-control (Healthy controls, PD, SWEDD)	EPIC	European	164	107	130	61.1	38.0-82.3
SHIP-TREND	Population-based	EPIC	European	441	194	0	50.3	21.0-79.0
SNiP	Population-based	EPIC	European	378	193	0	28.1	14.0-65.0
STRATIFY	Case-control (Healthy controls, MDD, AUD, ADHD, Psychosis)	EPIC v2	European	331	115	292	23	18.1-30.0
Total				4925	2329	1443
Replication cohort - European ancestry, with the 450k array
GenR	Population-based	450k	European	378	187	0	10.1	8.7-12.0
LBC1936	Population-based	450k	European	541	289	0	72.7	71.0-74.2
MPIP	Case-control (Healthy controls, MDD)	450k	European	588	264	385	48.2	18.6-88.5
NTR	Population-based Twin Study	450k	European	179	69	0	35.7	20.0-57.0
OATS	Population-based Twin Study	450k	European	151	57	0	70.3	65.0-83.0
PAFIP	Case cohort (Psychosis)	450k	European	46	46	46	27.7	17.1-48.5
SYS	Population-based	450k	European	269	136	8	36.2	12.2-61.6
Total				2152	1048	439
Replication cohort - non European ancestry, with the 450k or EPIC array
CTAAC	Case-control (Healthy controls, HIV)	EPIC	Black African	216	102	175	10.6	9.0-12.3
BIP-SYD	Case-control (Healthy controls, BD, SSD)	450k + EPIC	European/Asian/Mixed	195	89	101	21.7	12.0-32.0
Cohort used for MRS validation - European ancestry, with the EPIC array
ALSPAC	Population-based	EPIC	European	571	571	0	20.7	15.4-26.4

## Sheet: Table S2
Table S2. Description of the imaging data for discovery and replication cohorts.
Cohort	Scanner(s)	Software	Acquistion Information
ADNI	1.5 T GE, Philips, and Siemens MRI scanners; 3.0 T GE, Philips, and Siemens MRI scanners	FreeSurfer (5.3.0)	1.5T GE, Philips, and Siemens MRI scanners with a magnetization prepared rapid acquisition gradient echo (MPRAGE) sequence were used. Two high-resolution T1-weighted MRI scans were collected for each participant using a sagittal 3D MP-RAGE sequence with an approximate TR=2400ms, minimum full TE, approximate TI=1000ms, and approximate flip angle of 8 degrees. Scans were collected with a 24cm field…
ALSPAC	3.0 T GE, magnet HDx system	FreeSurfer (v6.0.0)	T1-weighted, 3S FSPGR sequence: oblique-axial orientation; 1-mm isotropic voxel size, field of view 256 x 256 x 192mm2; TR/TE = 7.9ms/3.0ms; TI=450ms; flip angle = 20 deg
BIP-SYD	3T Philips Achieva	FreeSurfer (5.3.0)	Each image set included 180 sagittal T1-weighted three dimensional turbo field-echo images (repetition time/echo time =5.5/2.5 ms, flip angle = 8°, field of view = 56× 256× 180 mm3, voxel size = 1× 1 ×1 mm3, scan time = 371 s).
CTAAC	Siemens Magnetom Allegra 3T	FreeSurfer (5.3.0)	Structural MRI data were acquired on a 3.0 T Siemens MAGNETOM Allegra scanner using a four-channel head coil. A high-resolution T1-weighted magnetization-prepared rapid gradient echo (MPRAGE) sequence was collected with the following parameters: TR = 2530 ms, TE = 1.53/3.21/4.89/6.57 ms, TI = 1100 ms, flip angle = 7°, field of view = 256 × 256 mm, acquisition matrix = 256 × 192, 144 sagittal slic…
DBIS	3.0 T Siemens MAGNETOM Skyra	FreeSurfer (5.3.0)	T1-weighted images were obtained using an MP-RAGE sequence with the following parameters: repetition time (TR) = 2,400 ms; echo time (TE) = 1.98 ms; 208 sagittal slices; flip angle, 9°; field of view (FOV), 224 mm; matrix = 256 × 256 px; slice thickness = 0.9 mm with no gap (voxel size 0.9 × 0.875 × 0.875 mm); and total scan time = 6 min and 52 s.
ESTRA	3.0 T GE, and Siemens MRI scanners	FreeSurfer (5.3.0)	Magnetic resonance imaging data were acquired at 2 London centers, using a standardised 3 Tesla, T1-weighted gradient echo protocol (voxel size=1.1 mm isotropic) based on that from the ADNI initiative (http://adni.loni.usc.edu/methods/documents/mri-protocols/).
FOR2107Marburg	3T Siemens Magnetom TiroTim syngo	FreeSurfer (5.3.0)	3D T1-weighted magnetization prepared rapid acquisition gradient echo (MPRAGE); TR=1900ms, TE=2.26ms, TI=900ms, FA=9°, voxel size=1.0x1.0x1.0mm³, Acquisition Direction Sagittal, 176 slices, slice gap 0.5mm.
FOR2107Münster	3T Siemens PRISMA	FreeSurfer (5.3.0)	T1-weighted magnetization prepared rapid acquisition gradient echo (MPRAGE); TR=2130ms, TE=2.28ms, TI=900ms, FA=8°, voxel size=1.0x1.0x1.0mm³, Acquisition Direction Sagittal, 192 slices, no slice gap.
GenR	3-T GE MR750W scanner (General Electric, Milwaukee, WI)	FreeSurfer (6.0)	T1-weighted scans were acquired using an inversion recovery fast spoiled gradient recalled echo sequence (TR = 8.77 ms, TE = 3.4ms, TI = 600ms, flip angle = 10°, acquisition matrix = 220 x 220, FOV = 220 mm x 220 mm, slice thickness = 1 mm, number of slices = 230, voxel size = 1mm x 1mm x 1mm, ARC Acceleration = 2).
IMAGEN	3.0 T Philips Medical Systems Achieva; 3.0 T Brucker; 3.0 T Siemens TrioTim; 3.0 T Siemens Verio; 3.0 T Brucker/GE Medical Systems Signa Excite; 3.0 T GE Medical Systems Signa HDx	FreeSurfer (5.3.0)	Magnetic resonance imaging data were acquired at 8 European centers, using a standardised 3 Tesla, T1-weighted gradient echo protocol (voxel size=1.1 mm isotropic) based on that from the ADNI initiative (http://adni.loni.usc.edu/methods/documents/mri-protocols/).
LBC1936	1.5 T GE Signa Horizon HDx clinical scanner	FreeSurfer (5.3.0)	3D IR-Prep T1-weighted whole brain FSPGR volumes were acquired in the coronal plane using a GE Signa Horizon HDxt 1.5 T clinical MRI scanner with manufacturer supplied eight-channel phased-array head coil; FOV = 256 x 256 mm, matrix = 192 x 192, 160 x 1.3 mm thick slices, 1 x 1 x 1.3 mm voxels, TR = 10 ms, TE = 4 ms and TI = 500 ms.
MCIC	1.5 T Siemens (at 2 sites); 3.0 T Siemens Trio (at 1 site); 1.5 T GE Signa (at 1 site)	FreeSurfer (5.3.0)	T1 scans: TR = 2530 ms for 3 T, TR = 12 ms for 1.5 T; TE = 3.79 ms for 3 T, TE = 4.76 ms for 1.5 T; FA = 7 for 3 T, FA = 20 for 1.5 T; TI = 1100 for 3 T; Bandwidth = 181 for 3 T, Bandwidth = 110 for 1.5 T; 0.625×0.625 mm voxel size; slice thickness 1.5 mm; FOV 256×256×128 cm matrix; FOV = 16 cm (could be increased to 18 cm when needed for full brain coverage). T2 scans: TR = 10,000 ms for 3 T, TR…
MPIP	1.5 T GE Signa (Excite), and 1.5 T Siemens Vario (at 2 sites)	FreeSurfer (5.3.0)	#1: GE Signa, 1.5T T1-weighted SPGR sagittal 3D volume (TR=10.3 s; TE=3.4 ms; 124 slices, matrix size=256x256, FOV=23.0x23.0 cm2, voxel size=0.8975x0.8975x[1.2-1.4] mm3, flip angle=90°, birdcage resonator) (N=347); #2: same scanner as #1, platform update Signa Excite, sagittal T1-weighted (spin echo sequence, TR=9.7 ms, TE=2.1 ms, FOV 25.0x25.0 cm2, voxel size= 0.875x0.875x1.2 mm3, 124-132 slices…
NTR	#1 3.0 T Philips Intera at one site; #2-3 1.5 T Siemens Sonata at two sites; #4 1.5 T Philips Gyroscan at one site	FreeSurfer (5.1.0)	#1: A Philips Intera 3.0 T scanner (Philips, Medical Systems, Best) with a standard SENSE receiver head coil was used. A 3D gradient-echo T1-weighted sequence (technique: T1TFE) was run for all. 182 coronal slices (1.00x1.00x1.20 mm3), (TR=9.64 ms; TE=4.60 ms; flip angle=8°; and 256×256). #2: A Siemens Sonata 1.5 T scanner (Siemens, Erlangen, Germany) with a standard circularly polarized head coi…
OATS	#1 1.5 T Philips Gyroscan; #2 3.0 T Philips Achieva Quasar Dual; #3 1.5 T Siemens Magnetom Avanto; #4 1.5 T Siemens Sonata	FreeSurfer (5.3.0)	#1 Sequence name T1TFE. In-plane resolution 1×1 mm. 256 × 256 matrix. Slice thickness 1.5 mm without gap. Number of slices: 150. Orientation: cor TR/TE: 7.73/3.7 ms Flip angle: 8°. Scan duration: 385 sec. #2 Acquisition parameters for T1-weighted structural MRI scans were: TR = 6.39 ms, TE = 2.9 ms, flip angle = 8°, matrix size = 256x256, FOV = 256x256x190, and slice thickness = 1 mm with no gap …
PAFIP	1.5 T GE SIGNA System	FreeSurfer (5.0)	T1-weighted images, using a spoiled grass (SPGR) sequence, were acquired in the coronal plane with the following parameters: echo time (TE)=5 ms, repetition time (TR)=24 ms, number of excitations (NEX)=2, rotation angle=45°, field of view (FOV)=26×19.5 cm, slice thickness=1.5 mm and a matrix of 256×192.
PPMI	3.0 T GE, Philips, and Siemens MRI scanners	FreeSurfer (5.3.0)	T1-weighted scans were optimized per scanner and followed ADNI protocols. Type of sequence T1-3D e.g. MPRAGE, SPGR, Slice thickness (mm) 1.2, Interslice gap (mm) 0, Voxel size (mm) 1*1*1.2, Matrix 256 x 256 x 170-200, Plane Sagittal.
SHIPTREND	1.5 T Siemens Avanto	FreeSurfer (5.3.0)	3D T1-weighted MRI sequence with the following parameters: MP-RAGE/ axial plane, TR=1900 ms, TE=3.4 ms and Flip angle=15° and an original resolution of 1.0 x 1.0 x 1.0mm3.
SNiP	3.0 T Siemens Trio	FreeSurfer (5.3.0)	T1-weighted magnetization prepared rapid acquisition gradient echo. 151 participants: 32-channel coil, echo time 3.8 ms, repetition time 2530 ms, inversion time 1100 ms, flip angle α: 7°, voxel size 1 mm3, matrix 256 x 256, 256 mm field of view, and 1 mm slice thickness. 227 participants: 12-channel coil, echo time 3.03 ms, repetition time 2300 ms, inversion time 900 ms, flip angle α: 9°, voxel s…
STRATIFY	3.0 T GE, and Siemens MRI scanners	FreeSurfer (5.3.0)	Magnetic resonance imaging data were acquired at 2 London centers, using a standardised 3 Tesla, T1-weighted gradient echo protocol (voxel size=1.1 mm isotropic) based on that from the ADNI initiative (http://adni.loni.usc.edu/methods/documents/mri-protocols/).
SYS	1.0T Philips for adolescents; 1.5T Siemens for parents	FreeSurfer (5.1.0)	Three-dimensional (3D) radio frequency (RF)- spoiled gradient-echo scan with 140 –160 slices, an isotropic resolution of 1 mm, a repetition time (TR) of 25 ms, an echo time (TE) of 5 ms, and flip angle of 30°

## Sheet: Table S3
Table S3. Assessment of inflation and bias in EWAS summary statistics for each cohort.
Cohorts	Average CT		Average Frontal CT		Average Temporal CT		Average Occipital CT		Average Parietal CT		Average Cingulate CT		Average Insula CT		Total SA		Total Frontal SA		Total Temporal SA		Total Occipital SA		Total Parietal SA		Total Cingulate SA		Total Insula SA
	Inflation	Bias	Inflation	Bias	Inflation	Bias	Inflation	Bias	Inflation	Bias	Inflation	Bias	Inflation	Bias	Inflation	Bias	Inflation	Bias	Inflation	Bias	Inflation	Bias	Inflation	Bias	Inflation	Bias	Inflation	Bias
ADNI	0.990785	-0.0142421	0.981499	-0.00469275	0.983359	-0.0100736	1.00434	0.00380059	1.02277	-0.00773411	0.977191	-0.0321881	0.985531	-0.00928658	0.961623	0.019642	0.962852	0.0153259	0.972863	0.0172413	0.962473	0.011184	0.954749	0.0200603	0.9724	0.0325946	0.986465	0.0211001
BIP-SYD	0.990073	0.00138342	0.989897	-0.0119631	1.00058	0.0099799	0.978175	0.0158888	1.02966	-0.00520433	0.966183	-0.0150555	0.984404	0.0136019	0.970875	0.00579553	0.973247	0.00339974	0.9714	-0.00671042	1.00581	0.0166824	0.956805	0.0048801	0.970927	0.00252639	0.9783	0.00722687
CTAAC	1.00693	-0.00569939	1.01284	-0.000224113	1.0032	-0.0059615	1.01283	-0.00217231	0.999832	0.00523749	1.02112	-0.00303436	0.996718	-0.0104515	0.983606	0.00429519	0.985451	0.00622876	0.967297	-0.00175453	0.992826	0.00433917	0.979727	0.00552875	0.981902	-0.00358727	0.980555	-0.00324855
DBIS	1.06206	-0.00422881	1.04573	0.0176193	1.01006	-0.000914578	1.05132	0.00969473	1.09225	0.0017253	1.02216	-0.017607	1.01939	0.000993165	1.00026	0.00961211	0.986931	0.0111968	0.999492	0.00851659	0.993058	-0.000393515	0.993662	0.0102968	1.01594	0.00872241	0.987682	0.0107217
ESTRA	0.941536	0.0197739	0.982213	0.0117616	0.959301	0.00421934	1.00616	-0.0183888	0.964055	0.00246518	1.02193	0.0063854	1.07628	0.00951644	1.02991	0.0198598	1.02548	0.0159775	1.06738	0.0118013	0.958802	0.0135605	1.05359	0.0240063	0.97644	0.0141508	1.00629	-0.163819
FOR2107Marburg	0.99601	0.00480925	0.989982	-0.00116629	0.997225	-0.00306935	1.00333	-0.0120215	1.00915	-0.0117787	1.00052	-0.0148606	0.989392	-0.00255998	1.00064	-0.00276042	1.00542	0.000802462	0.972677	0.00414667	0.990819	0.011084	0.980616	-0.00250562	1.0004	0.00538475	0.98181	0.0043338
FOR2107Münster	0.987993	-0.00338449	0.986298	0.0116922	0.989691	-0.00803588	0.991262	0.0102473	0.983221	0.00470038	0.963397	0.0117604	0.983717	0.0104067	0.994079	0.0119548	0.986965	0.0226637	1.00691	0.00451908	0.979508	0.0106557	1.00937	0.00628485	0.969211	0.00461467	0.98196	0.0107874
GenR	0.999422	-0.0125524	0.977355	-0.0235404	0.976454	-0.0160274	0.981655	0.0180479	0.991636	0.0011966	0.992114	-0.025337	1.02077	-0.00442584	0.981719	-0.00329559	0.973769	0.00114519	0.969379	-0.0229787	0.983004	-0.00289004	1.00151	0.000783462	1.02227	-0.017083	0.976151	0.0172069
IMAGEN	1.00096	-0.0382809	1.02312	-0.0402844	1.04347	0.0222762	1.00777	0.0162325	1.04186	0.0301364	1.09559	0.00297529	1.03632	0.0160619	0.988271	0.00818822	0.995664	0.00325479	0.986687	0.00422802	0.982974	0.0087542	0.993023	0.0139958	1.00512	0.00324981	0.985987	0.0100664
LBC1936	0.972709	-0.0281812	0.846103	0.00116937	0.924913	0.0312617	1.03024	-0.0264542	1.02623	-0.0437023	0.843328	-0.0307438	0.931385	-0.0442081	0.973806	-0.00819413	1.01005	-0.0180464	0.955514	-0.018301	0.932377	-0.0104492	0.933966	-0.00227982	0.984233	-0.00139574	1.12986	0.0141918
MCIC	1.02175	-0.0259646	0.993771	-0.0131971	1.01759	-0.024329	1.04223	-0.0421056	1.01461	-0.019231	1.01307	-0.00833789	1.03028	-0.0246581	1.01122	-0.00849436	0.991061	-0.00725501	1.00212	-0.00957783	1.01005	-0.0112351	1.02509	-0.0127612	1.01599	-0.0150695	0.999586	-0.0100786
MPIP	0.959542	-0.00524388	0.948654	-0.00726763	0.994301	-0.00539734	0.966735	-0.00447786	0.946597	0.000257975	0.982731	0.00130938	0.991538	-0.00761666	0.985095	0.017098	0.979786	0.014244	0.938765	0.00634497	0.975011	0.0218143	1.02458	0.0184261	1.03609	0.0201099	0.958342	0.00267293
NTR	1.11399	0.0241735	1.15351	0.0239988	1.11696	0.018688	1.05955	0.000114138	1.1263	0.0170582	1.10411	0.0131805	1.09078	0.0307275	1.08757	-5.82638e-05	1.09956	-0.00910738	1.07914	0.00274822	1.06663	0.00911281	1.08186	0.00401327	1.11284	-0.00886969	1.06408	0.0146666
OATS	1.10755	-0.00363715	1.10643	0.0138733	1.13195	-0.0218655	1.11102	0.000431737	1.09969	0.00403134	1.14191	-0.0129845	1.10646	-0.0116026	1.12721	-0.0135052	1.12895	-0.00336161	1.10649	-0.0179284	1.10018	-0.0184748	1.14776	-0.019148	1.10754	0.0128666	1.09637	0.00415381
PAFIP	0.983289	-0.00669868	0.979527	-0.00781473	0.996866	-0.0109434	0.998296	-0.00657142	0.979728	-0.0113772	1.02352	-0.00111519	0.98998	0.005322	1.00205	0.013999	1.00118	0.0071597	1.02275	0.0161638	1.02639	-0.00437798	0.997716	0.0245033	1.01806	0.0010797	1.03296	-0.00077825
PPMI	1.04444	0.00104371	1.01636	0.0565815	0.971962	0.00485643	1.02317	0.00476736	1.02101	-0.0169287	1.03065	0.0115075	1.05055	0.00520433	1.01016	0.0173894	1.00646	0.0155526	0.982651	0.00560382	1.01865	0.021447	1.00036	0.0150748	1.04079	0.0183786	1.05218	0.00309611
SHIPTREND	1.04332	-0.000755449	1.04744	-0.00184587	1.04597	0.00202984	1.0166	-0.0100173	1.02491	-0.00927071	1.02965	0.00409452	1.02013	0.00988165	1.03692	-0.0133353	1.03296	-0.0149026	1.0317	-0.013443	1.01161	-0.0110342	1.02326	-0.0086111	1.01253	-0.010833	1.02524	-0.00936106
SNiP	0.977389	-0.0209406	0.997578	-0.0193433	0.957342	-0.0271721	0.988273	-0.0219477	0.972953	-0.0144953	0.988508	-0.000461536	0.966661	-0.00873239	1.01384	0.00228794	1.01352	7.98428e-05	1.0118	-0.00456392	1.00328	0.0155538	1.00008	-0.00120171	1.02155	-0.0112432	1.01514	-0.000508644
STRATIFY	0.997765	-0.000516915	1.00777	-0.00257444	1.00534	0.000792588	0.997015	-0.00166451	0.98021	0.00266381	0.999125	0.00673953	0.988902	-0.00466549	1.00668	-0.00742508	0.992618	-0.00928573	0.99831	-0.00972713	1.00293	-0.00275207	1.01297	-0.00547242	0.998169	-0.00855038	0.985862	-0.00231356
SYS	1.13433	-0.0169278	1.08937	-0.0123565	1.09745	-0.00815933	1.03216	-0.01005	1.04874	-0.0121909	1.03259	-0.0104742	1.04482	-0.0173929	0.997018	0.0170005	1.02357	0.00801229	1.027	0.00658567	0.962014	0.0150864	0.988451	0.005686	0.960498	0.0141866	1.03339	0.0100667

## Sheet: Table S4
Table S4. Discovery and replication of FDR-significant CpGs associated with average CT and total SA (hg19 reference genome).
												Discovery										Replication
												European cohorts assessed with EPIC array (N = 4925)										Meta-analysis in European replication cohorts arrayed with 450k (N = 2152)							Meta-analysis in combined European samples (discovery and replication cohorts; N = 7077)							Meta-analysis combining all cohorts (EUR + other ancestries; N up to 7488)
Phenotype	CpG	CHR	BP	UCSC_RefGene_Group	Relation to UCSC CpG Island	Regulatory Feature Group	Gene (distance to TSS)	Probe reliability estimates, from PMID: 32885222				N	Zscore	P.value	Direction	HetISq	HetChiSq	HetDf	HetPVal	FDR.q	PBonferroni < 0.05	Zscore	P.value	Direction	HetISq	HetChiSq	HetDf	HetPVal	Zscore	P.value	Direction	HetISq	HetChiSq	HetDf	HetPVal	Zscore	P.value	Direction	HetISq	HetChiSq	HetDf	HetPVal
								Reliability	Mean β value	SD β value	Notes (<0.4, poor; 0.4-0.6, fair; 0.6-0.75, good; >0.75, excellent)
Average CT	cg13518625	chr8	29522838	0	0	Unclassified	DUSP4 (-314654), TMEM66 (+417884)	0.583571	0.151924	0.0433518	Fair	4925	5.831	5.51e-09	+++++++++++	0	8.288	10	0.6008	0.00327693	✓	2.547	0.01085	-++++++	21.2	7.614	6	0.2678	6.27	3.608e-10	+++++++++++-++++++	0.5	17.077	17	0.4491	5.959	2.532e-09	+++++++++++-++++++--	10.7	21.272	19	0.322
Average CT	cg03636183	chr19	17000586	0	N_Shore	0	F2RL3 (+916)	0.627249	0.712717	0.0381477	Good	4925	5.621	1.9e-08	+++++++++++	49.1	19.637	10	0.03288	0.00552697	✓	2.399	0.01645	+--+++-	40.7	10.123	6	0.1196	6.013	1.824e-09	++++++++++++--+++-	45.1	30.955	17	0.02023	5.758	8.493e-09	+++++++++++++---++-+	45.6	34.94	19	0.0142
Average CT	cg12303084	chr20	45985741	TSS1500	0	Promoter_Associated	ZMYND8 (-328)	0.472759	0.224143	0.0271327	Fair	4925	5.554	2.788e-08	+++++++-+++	0	9.858	10	0.453	0.00552697	✓	2.04	0.04135	-++++++	22	7.688	6	0.2619	5.76	8.436e-09	+++++++-+++-++++++	12.3	19.385	17	0.3069	5.393	6.923e-08	+++++++-+++-+++++++-	25.5	25.512	19	0.1444
Average CT	cg00024404	chr5	79552470	TSS1500	S_Shore	Promoter_Associated	SERINC5 (-573)	0.620412	0.158928	0.0310265	Good	4925	5.413	6.197e-08	+++++++++++	0	8.457	10	0.5843	0.00776709	✓	-0.411	0.6809	-+-++--	0	4.837	6	0.5649	4.292	1.773e-05	+++++++++++-+-++--	30.2	24.345	17	0.1104	3.761	0.0001693	+++++++++++-++---+--	40.2	31.762	19	0.03323
Average CT	cg21566642	chr2	233284661	0	Island	0	ALPI (-36171), ALPPL2 (+13109)	0.800765	0.468597	0.0601348	Excellent	4925	5.389	7.078e-08	+++++++++++	32.6	14.828	10	0.1385	0.00776709	✓	3.416	0.0006355	+++++++	33.1	8.972	6	0.1751	6.38	1.776e-10	++++++++++++++++++	28.6	23.814	17	0.1246	6.414	1.417e-10	+++++++++++++++++++-	27.5	26.194	19	0.1249
Average CT	cg10002435	chr17	79577359	5'UTR	0	0	C17orf70 (-57957), NPLOC4 (+26812)	NA	NA	NA	Unique to EPIC	4925	-5.371	7.836e-08	-------+---	0	3.786	10	0.9565	0.00776709	✓	NA	NA	NA	NA	NA	NA	NA	NA	NA	NA	NA	NA	NA	NA	-5.373	7.756e-08	-------+---???????-?	0	4.086	11	0.9673
Average CT	cg01764256	chr20	45985832	TSS1500	0	Promoter_Associated	ZMYND8 (-419)	NA	NA	NA	Unique to EPIC	4925	5.332	9.699e-08	+++++++-+++	0	9.878	10	0.4513	0.00824033		NA	NA	NA	NA	NA	NA	NA	NA	NA	NA	NA	NA	NA	NA	5.269	1.373e-07	+++++++-+++???????+?	0	10.609	11	0.4766
Average CT	cg02464519	chr15	41158367	0	0	0	RHOV (+8119), SPINT1 (+22152)	NA	NA	NA	Unique to EPIC	4925	5.191	2.095e-07	+++++++--++	0	9.825	10	0.456	0.0155743		NA	NA	NA	NA	NA	NA	NA	NA	NA	NA	NA	NA	NA	NA	4.929	8.268e-07	+++++++--++???????-?	15.5	13.02	11	0.292
Average CT	cg01015663	chr1	23729692	0	0	0	ZNF436 (-33758), TCEA3 (+21540)	0.77867	0.490806	0.0666708	Excellent	4925	5.14	2.744e-07	++++-+++++-	19.3	12.39	10	0.2598	0.0176309		2.454	0.01412	++-+++-	31.9	8.809	6	0.1846	5.642	1.68e-08	++++-+++++-++-+++-	22.1	21.811	17	0.1921	5.13	2.898e-07	++++-+++++-+++--++--	36.1	29.744	19	0.05514
Average CT	cg17034109	chr1	110036417	TSS1500	N_Shore	Promoter_Associated	CYB561D1 (-318)	0.225102	0.558965	0.0328996	Poor	4925	5.123	3.007e-07	++++++++++-	4.1	10.432	10	0.4034	0.0176309		0.029	0.9772	-++-+--	28	8.333	6	0.2147	4.292	1.772e-05	++++++++++--++-+--	36.1	26.591	17	0.06434	3.847	0.0001197	++++++++++--++-+--+-	45.2	34.684	19	0.01524
Average CT	cg05307394	chr2	62611092	0	0	0	TMEM17 (+122383), B3GNT2 (+187845)	NA	NA	NA	Unique to EPIC	4925	5.108	3.261e-07	+++++++++++	0	7.973	10	0.6315	0.0176309		NA	NA	NA	NA	NA	NA	NA	NA	NA	NA	NA	NA	NA	NA	4.655	3.232e-06	+++++++++++???????-?	27.6	15.2	11	0.1735
Average CT	cg12670943	chr22	43006541	0	N_Shelf	0	POLDIP3 (+4426), SERHL2 (+56617)	0.565267	0.813491	0.0279279	Fair	4925	-5.077	3.836e-07	-----------	0	1.978	10	0.9965	0.0190113		-0.155	0.8765	+++----	41.9	10.322	6	0.1117	-4.323	1.538e-05	-----------+++----	12.4	19.41	17	0.3055	-4.352	1.352e-05	-----------+-+-+---+	10.9	21.321	19	0.3194
Average CT	cg15183129	chr1	160759781	0	0	Unclassified_Cell_type_specific	LY9 (-6166), SLAMF7 (+50727)	NA	NA	NA	Unique to EPIC	4925	-5.047	4.499e-07	----+--+---	6.5	10.692	10	0.382	0.020582		NA	NA	NA	NA	NA	NA	NA	NA	NA	NA	NA	NA	NA	NA	-4.593	4.364e-06	----+--+---???????+?	38.6	17.913	11	0.08362
Average CT	cg10802833	chr7	47420887	5'UTR	0	0	TNS3 (+158311)	NA	NA	NA	Unique to EPIC	4925	-4.908	9.189e-07	-----------	0	5.049	10	0.8879	0.0378165		NA	NA	NA	NA	NA	NA	NA	NA	NA	NA	NA	NA	NA	NA	-4.602	4.193e-06	-----------???????+?	0	8.941	11	0.6273
Average CT	cg19901969	chr16	20877654	5'UTR	0	0	DCUN1D3 (+34051), ENSG00000005189 (+59834)	NA	NA	NA	Unique to EPIC	4925	4.901	9.538e-07	+++++++++++	0	3.838	10	0.9543	0.0378165		NA	NA	NA	NA	NA	NA	NA	NA	NA	NA	NA	NA	NA	NA	4.886	1.032e-06	+++++++++++???????+?	0	4.176	11	0.9645
Average CT	cg00144480	chr2	40987580	5'UTR	0	Unclassified_Cell_type_specific	SLC8A1 (-248080)	NA	NA	NA	Unique to EPIC	4925	4.87	1.113e-06	++++++-+-++	24.4	13.236	10	0.2108	0.0413705		NA	NA	NA	NA	NA	NA	NA	NA	NA	NA	NA	NA	NA	NA	4.411	1.028e-05	++++++-+-++???????-?	46.4	20.511	11	0.03881
Average CT	cg02286809	chr15	101629375	0	Island;S_Shelf	Unclassified	CHSY1 (+162761), LRRK1 (+169956)	0.457607	0.782885	0.0453963	Fair	4925	4.856	1.196e-06	-+-++++++++	35.8	15.574	10	0.1125	0.0418406		-1.156	0.2478	+---+-+	0	5.981	6	0.4254	3.417	0.0006332	-+-+++++++++---+-+	51.1	34.798	17	0.006612	3.419	0.0006276	-+-++++++++++-+---+-	47.2	36.007	19	0.01054
Average CT	cg14495063	chr3	48557236	3'UTR	0	Unclassified_Cell_type_specific	SHISA5 (-15373), PFKFB4 (+37086)	NA	NA	NA	Unique to EPIC	4925	-4.822	1.423e-06	---+-------	12.9	11.486	10	0.3209	0.0436414		NA	NA	NA	NA	NA	NA	NA	NA	NA	NA	NA	NA	NA	NA	-4.841	1.29e-06	---+-------???????-?	5.6	11.651	11	0.3905
Average CT	cg10587886	chr3	8361835	0	0	0	LMCD1 (-181557)	NA	NA	NA	Unique to EPIC	4925	4.812	1.497e-06	+++-+++++-+	36.7	15.796	10	0.1056	0.0436414		NA	NA	NA	NA	NA	NA	NA	NA	NA	NA	NA	NA	NA	NA	4.54	5.623e-06	+++-+++++-+???????-?	42.2	19.017	11	0.06078
Average CT	cg21998542	chr10	33605101	5'UTR	0	0	ITGB1 (-358280), NRP1 (+20088)	NA	NA	NA	Unique to EPIC	4925	4.807	1.535e-06	-+-++++--++	49.9	19.974	10	0.0295	0.0436414		NA	NA	NA	NA	NA	NA	NA	NA	NA	NA	NA	NA	NA	NA	4.789	1.676e-06	-+-++++--++???????+?	45.8	20.313	11	0.04123
Average CT	cg14284211	chr6	35570224	5'UTR	0	0	TULP1 (-89510), FKBP5 (+126135)	0.723448	0.193161	0.0451036	Good	4925	4.806	1.541e-06	+++-++++-++	3.3	10.346	10	0.4107	0.0436414		1.986	0.04706	++-++++	0	3.018	6	0.8066	5.105	3.308e-07	+++-++++-++++-++++	0	14.342	17	0.6428	4.709	2.493e-06	+++-++++-++++++-++--	2.2	19.428	19	0.4297
Average CT	cg23695135	chr2	25704570	0	0	0	DNMT3A (-139112), DTNB (+191932)	NA	NA	NA	Unique to EPIC	4925	-4.779	1.76e-06	--+-----+--	27.2	13.745	10	0.1849	0.0475779		NA	NA	NA	NA	NA	NA	NA	NA	NA	NA	NA	NA	NA	NA	-4.865	1.146e-06	--+-----+--???????-?	20	13.753	11	0.247
Average CT	cg05525308	chr10	31348500	0	0	0	ZEB1 (-259600), ZNF438 (-27635)	NA	NA	NA	Unique to EPIC	4925	4.763	1.908e-06	++++-++++++	0	7.991	10	0.6298	0.0491837		NA	NA	NA	NA	NA	NA	NA	NA	NA	NA	NA	NA	NA	NA	4.269	1.96e-05	++++-++++++???????-?	31.7	16.114	11	0.1369
Average CT	cg00920892	chr8	37732224	TSS1500	0	Gene_Associated_Cell_type_specific	BRF2 (-24803), RAB11FIP1 (+24747)	0.832673	0.618446	0.0549652	Excellent	4925	-4.753	2.002e-06	--+-++--+--	68.5	31.737	10	0.000443	0.0491837		-0.82	0.4123	--+++--	0	1.685	6	0.9463	-4.419	9.905e-06	--+-++--+----+++--	54.2	37.157	17	0.003204	-4.261	2.037e-05	--+-++--+---+--+-++-	51.2	38.934	19	0.004505
Average CT	cg09010260	chr12	54842484	5'UTR	0	0	ITGA5 (-29241), GTSF1 (+23926)	NA	NA	NA	Unique to EPIC	4925	4.747	2.069e-06	++++++++-++	43.8	17.79	10	0.05861	0.0491837		NA	NA	NA	NA	NA	NA	NA	NA	NA	NA	NA	NA	NA	NA	4.529	5.938e-06	++++++++-++???????-?	45.4	20.139	11	0.04347
Average CT	cg25563198	chr6	35696726	TSS1500	S_Shore;N_Shelf	Promoter_Associated	FKBP5 (-367)	NA	NA	NA	Unique to EPIC	4925	4.729	2.259e-06	+++++++-+++	0	8.159	10	0.6134	0.0491837		NA	NA	NA	NA	NA	NA	NA	NA	NA	NA	NA	NA	NA	NA	4.623	3.781e-06	+++++++-+++???????-?	0	9.148	11	0.6083
Average CT	cg10961050	chr9	72661814	0	S_Shelf	0	SMC5 (-212122), MAMDC2 (+3318)	NA	NA	NA	Unique to EPIC	4925	4.727	2.281e-06	-++++++--++	22.4	12.891	10	0.2298	0.0491837		NA	NA	NA	NA	NA	NA	NA	NA	NA	NA	NA	NA	NA	NA	4.525	6.048e-06	-++++++--++???????-?	26.7	15.007	11	0.1822
Average CT	cg16838957	chr3	123038798	0	0	0	SEC22A (+111630), ADCY5 (+129806)	NA	NA	NA	Unique to EPIC	4925	-4.712	2.45e-06	--+----+---	0	7.565	10	0.6712	0.0491837		NA	NA	NA	NA	NA	NA	NA	NA	NA	NA	NA	NA	NA	NA	-4.376	1.209e-05	--+----+---???????+?	8	11.951	11	0.3674
Average CT	cg01115209	chr15	48255762	5'UTR	0	0	SLC24A5 (-157406), SEMA6D (+245077)	NA	NA	NA	Unique to EPIC	4925	-4.712	2.454e-06	-------+---	0	5.342	10	0.8672	0.0491837		NA	NA	NA	NA	NA	NA	NA	NA	NA	NA	NA	NA	NA	NA	-4.842	1.285e-06	-------+---???????-?	0	5.36	11	0.9125
Average CT	cg17606266	chr16	75030947	0	N_Shore	0	ZNRF1 (-1980)	NA	NA	NA	Unique to EPIC	4925	4.71	2.481e-06	++++++++-++	13.1	11.507	10	0.3194	0.0491837		NA	NA	NA	NA	NA	NA	NA	NA	NA	NA	NA	NA	NA	NA	4.926	8.392e-07	++++++++-++???????+?	6.8	11.804	11	0.3785
Average CT	cg19787469	chr16	86811993	0	0	0	FOXL1 (+199879), FBXO31 (+605369)	NA	NA	NA	Unique to EPIC	4925	4.7	2.599e-06	+++++++++++	0	6.402	10	0.7804	0.0498609		NA	NA	NA	NA	NA	NA	NA	NA	NA	NA	NA	NA	NA	NA	4.948	7.489e-07	+++++++++++???????+?	0	6.889	11	0.808
Total SA	cg21050046	chr3	17790877	3'UTR	0	0	TBC1D5 (-49366), SATB1 (+675187)	NA	NA	NA	Unique to EPIC	4925	-6.54	6.167e-11	-----------	59.9	24.951	10	0.005438	3.66766e-05	✓	NA	NA	NA	NA	NA	NA	NA	NA	NA	NA	NA	NA	NA	NA	-6.411	1.45e-10	-----------???????-?	58.7	26.625	11	0.005233
Total SA	cg23346269	chr21	31992208	TSS1500	0	0	KRTAP20-4 (-737)	NA	NA	NA	Unique to EPIC	4925	-5.759	8.478e-09	----+------	0	8.859	10	0.5456	0.00189717	✓	NA	NA	NA	NA	NA	NA	NA	NA	NA	NA	NA	NA	NA	NA	-5.444	5.216e-08	----+------???????+?	17.1	13.269	11	0.2761
Total SA	cg01305291	chr2	242003078	3'UTR	N_Shore	Unclassified_Cell_type_specific	MTERFD2 (+38668), SNED1 (+64824)	0.86489	0.460567	0.0688306	Excellent	4925	-5.737	9.622e-09	-----------	0	8.49	10	0.5811	0.00189717	✓	-0.404	0.6862	++-+---	26.3	8.137	6	0.2282	-5.013	5.347e-07	-----------++-+---	30.8	24.572	17	0.1047	-4.755	1.985e-06	-----------+-+---++-	33.5	28.556	19	0.07329
Total SA	cg03546806	chr12	114297307	0	0	0	LHX5 (-387431), RBM19 (+106803)	0.639642	0.686714	0.0540368	Good	4925	-5.689	1.276e-08	-----------	16.7	12.011	10	0.2844	0.00189717	✓	1.308	0.191	++--++-	10.7	6.715	6	0.348	-4.032	5.537e-05	-----------++--++-	53.5	36.548	17	0.003873	-3.656	0.0002562	-----------+++--+-++	53.6	40.97	19	0.002436
Total SA	cg26845363	chr1	53098421	TSS1500	N_Shore	0	FAM159A (-594)	NA	NA	NA	Unique to EPIC	4925	-5.475	4.383e-08	---+-------	38.1	16.153	10	0.09533	0.00521335	✓	NA	NA	NA	NA	NA	NA	NA	NA	NA	NA	NA	NA	NA	NA	-5.412	6.216e-08	---+-------???????-?	34.9	16.9	11	0.1109
Total SA	cg27159031	chr1	244192443	5'UTR	0	0	AKT3 (-179014), ZBTB18 (-22141)	NA	NA	NA	Unique to EPIC	4925	-5.207	1.918e-07	-----------	26.3	13.561	10	0.194	0.0186573		NA	NA	NA	NA	NA	NA	NA	NA	NA	NA	NA	NA	NA	NA	-5.31	1.094e-07	-----------???????-?	18.9	13.563	11	0.2581
Total SA	cg07519471	chr19	46526100	1stExon	Island	0	PGLYRP1 (+222)	0.729646	0.45248	0.0400458	Good	4925	-5.182	2.196e-07	--+--------	0	9.638	10	0.4728	0.0186573		-0.407	0.6843	-+-+--+	22.5	7.744	6	0.2575	-4.551	5.338e-06	--+---------+-+--+	28.2	23.687	17	0.1282	-4.877	1.076e-06	--+----------++--+--	27.2	26.116	19	0.127
Total SA	cg05660634	chr15	38965109	5'UTR	0	0	THBS1 (-908184), RASGRP1 (-108103)	NA	NA	NA	Unique to EPIC	4925	-5.118	3.093e-07	-----------	0	2.593	10	0.9895	0.0229935		NA	NA	NA	NA	NA	NA	NA	NA	NA	NA	NA	NA	NA	NA	-5.19	2.108e-07	-----------???????-?	0	2.628	11	0.9948
Total SA	cg20163478	chr17	43508418	TSS1500	Island	0	ARHGAP27 (-5422), PLEKHM1 (+59691)	NA	NA	NA	Unique to EPIC	4925	-5.095	3.49e-07	---+-------	0	8.238	10	0.6056	0.0230621		NA	NA	NA	NA	NA	NA	NA	NA	NA	NA	NA	NA	NA	NA	-5.168	2.372e-07	---+-------???????-?	0	8.271	11	0.6888
Total SA	cg04987734	chr14	103415873	0	0	Unclassified	AMN (+26881), CDC42BPB (+107925)	0.602628	0.370336	0.0532797	Good	4925	-5.03	4.904e-07	---------+-	0	6.746	10	0.7492	0.0291653		-1.896	0.05801	----+--	0	5.658	6	0.4626	-5.243	1.577e-07	---------+-----+--	0	13.806	17	0.6808	-4.931	8.181e-07	---------+--+-----++	0	17.512	19	0.5553

## Sheet: Table S5
Table S5. Comparisons of FDR-significant CpGs associated with global measures and regional CT and SA measures (frontal, temporal, occipital, parietal, and cingulate cortices) in the discovery meta-analysis.
Phenotype	CpG	Gene (distance to TSS)	Global measures		Frontal		Temporal		Occipital		Parietal		Cingulate		Insula
			Zscore	P.value	Zscore	P.value	Zscore	P.value	Zscore	P.value	Zscore	P.value	Zscore	P.value	Zscore	P.value
Average CT	cg13518625	DUSP4 (-314655), SARAF (+417884)	5.831	5.51e-09	5.378	7.53e-08	4.267	1.985e-05	3.159	0.001582	5.178	2.238e-07	3.46	0.0005398	5.845	5.052e-09
Average CT	cg03636183	F2RL3 (+915)	5.621	1.9e-08	5.513	3.518e-08	4.607	4.079e-06	3.924	8.703e-05	4.26	2.041e-05	1.926	0.05407	4.81	1.51e-06
Average CT	cg12303084	ZMYND8 (-301)	5.554	2.788e-08	5.155	2.53e-07	4.246	2.175e-05	4.862	1.163e-06	6.125	9.088e-10	4.096	4.208e-05	5.051	4.403e-07
Average CT	cg00024404	SERINC5 (-573)	5.413	6.197e-08	4.757	1.969e-06	2.47	0.01349	2.859	0.004244	4.518	6.239e-06	4.964	6.894e-07	4.832	1.351e-06
Average CT	cg21566642	ALPI (-36171), ALPG (+13109)	5.389	7.078e-08	5.646	1.642e-08	4.117	3.833e-05	3.74	0.0001841	4.393	1.117e-05	2.681	0.007343	3.645	0.0002677
Average CT	cg10002435	FAAP100 (-57957), NPLOC4 (+26812)	-5.371	7.836e-08	-3.602	0.0003155	-4.314	1.605e-05	-3.489	0.0004841	-3.803	0.0001429	-2.743	0.006081	-5.403	6.557e-08
Average CT	cg01764256	ZMYND8 (-392)	5.332	9.699e-08	5.502	3.756e-08	3.673	0.0002397	4.469	7.861e-06	4.905	9.335e-07	4.884	1.04e-06	4.576	4.745e-06
Average CT	cg02464519	RHOV (+8119), SPINT1 (+22152)	5.191	2.095e-07	4.368	1.255e-05	4.398	1.093e-05	2.261	0.02378	4.948	7.504e-07	3.506	0.0004555	3.249	0.001157
Average CT	cg01015663	ZNF436 (-33758), TCEA3 (+21540)	5.14	2.744e-07	4.53	5.905e-06	4.587	4.501e-06	3.341	0.0008353	4.412	1.024e-05	3.415	0.0006368	4.507	6.59e-06
Average CT	cg17034109	CYB561D1 (-318)	5.123	3.007e-07	4.223	2.412e-05	3.422	0.0006209	3.138	0.001702	3.416	0.0006351	4.196	2.716e-05	3.558	0.0003735
Average CT	cg05307394	TMEM17 (+122383), B3GNT2 (+187845)	5.108	3.261e-07	5.322	1.024e-07	4.328	1.504e-05	3.5	0.0004651	4.801	1.582e-06	2.217	0.02661	4.284	1.835e-05
Average CT	cg12670943	POLDIP3 (+4426), SERHL2 (+56617)	-5.077	3.836e-07	-4.998	5.78e-07	-4.433	9.3e-06	-2.447	0.01442	-3.18	0.001474	-2.245	0.02474	-4.18	2.914e-05
Average CT	cg15183129	LY9 (-6166), SLAMF7 (+50727)	-5.047	4.499e-07	-4.012	6.01e-05	-3.665	0.0002472	-3.257	0.001125	-4.233	2.301e-05	-3.173	0.001511	-5.577	2.452e-08
Average CT	cg10802833	TNS3 (+200853)	-4.908	9.189e-07	-3.966	7.298e-05	-3.967	7.273e-05	-3.546	0.0003911	-3.035	0.002405	-3.387	0.0007071	-3.275	0.001055
Average CT	cg19901969	DCUN1D3 (+34051), REXO5 (+59834)	4.901	9.538e-07	4.152	3.295e-05	3.51	0.0004486	2.926	0.003437	4.428	9.505e-06	2.313	0.02072	4.521	6.165e-06
Average CT	cg00144480	SLC8A1 (-248080)	4.87	1.113e-06	3.987	6.683e-05	2.932	0.003369	2.746	0.006034	3.143	0.001673	3.421	0.0006228	3.907	9.327e-05
Average CT	cg02286809	CHSY1 (+162761), LRRK1 (+169956)	4.856	1.196e-06	3.322	0.0008927	3.329	0.0008716	3.18	0.00147	3.882	0.0001037	2.801	0.005091	3.876	0.0001062
Average CT	cg14495063	SHISA5 (-15373), PFKFB4 (+37086)	-4.822	1.423e-06	-4.97	6.698e-07	-3.975	7.025e-05	-1.993	0.04626	-3.831	0.0001276	-2.719	0.006542	-4.783	1.728e-06
Average CT	cg10587886	LMCD1 (-181559)	4.812	1.497e-06	4.566	4.969e-06	3.698	0.0002173	3.444	0.0005734	4.301	1.702e-05	2.57	0.01017	3.725	0.0001951
Average CT	cg21998542	ITGB1 (-358280), NRP1 (+20088)	4.807	1.535e-06	5.147	2.643e-07	3.516	0.0004387	3.45	0.0005605	4.315	1.599e-05	2.303	0.02129	4.104	4.053e-05
Average CT	cg14284211	TULP1 (-89510), FKBP5 (+126135)	4.806	1.541e-06	5.084	3.701e-07	3.29	0.001003	4.147	3.371e-05	4.867	1.133e-06	1.012	0.3115	3.166	0.001545
Average CT	cg23695135	DNMT3A (-139112), DTNB (+191932)	-4.779	1.76e-06	-4.23	2.333e-05	-3.513	0.0004431	-3.643	0.0002693	-5.185	2.157e-07	-1.901	0.05727	-3.867	0.0001103
Average CT	cg05525308	ZEB1 (-259600), ZNF438 (-27635)	4.763	1.908e-06	4.597	4.287e-06	2.131	0.03309	3.843	0.0001215	3.289	0.001004	3.1	0.001933	4.77	1.842e-06
Average CT	cg00920892	BRF2 (-24803), RAB11FIP1 (+24747)	-4.753	2.002e-06	-4.444	8.832e-06	-3.629	0.0002847	-3.577	0.000348	-4.086	4.383e-05	-2.283	0.02244	-3.69	0.0002242
Average CT	cg09010260	ITGA5 (-29241), GTSF1 (+23926)	4.747	2.069e-06	5.543	2.978e-08	3.092	0.001988	3.926	8.621e-05	3.592	0.0003283	4.001	6.318e-05	2.87	0.004109
Average CT	cg25563198	FKBP5 (-367)	4.729	2.259e-06	4.881	1.054e-06	3.512	0.000445	3.765	0.0001668	4.841	1.292e-06	3.27	0.001074	3.33	0.000869
Average CT	cg10961050	SMC5 (-212063), MAMDC2 (+3318)	4.727	2.281e-06	4.14	3.479e-05	3.649	0.0002629	4.095	4.22e-05	4.378	1.199e-05	2.836	0.004569	4.155	3.253e-05
Average CT	cg16838957	SEC22A (+111630), ADCY5 (+129806)	-4.712	2.45e-06	-3.426	0.0006129	-2.378	0.01743	-2.793	0.005216	-3.762	0.0001686	-4.133	3.577e-05	-2.845	0.004441
Average CT	cg01115209	SLC24A5 (-157406), SEMA6D (+245077)	-4.712	2.454e-06	-2.883	0.003939	-3.292	0.0009936	-2.634	0.00845	-3.927	8.607e-05	-3.699	0.0002166	-3.275	0.001056
Average CT	cg17606266	ZNRF1 (-1980)	4.71	2.481e-06	3.725	0.000195	3.524	0.0004245	3.535	0.0004072	5.404	6.521e-08	3.67	0.0002425	2.215	0.02676
Average CT	cg19787469	FOXL1 (+199882), FBXO31 (+605369)	4.7	2.599e-06	3.752	0.0001755	2.798	0.005146	2.301	0.0214	2.723	0.006462	2.92	0.003502	4.205	2.606e-05
Total SA	cg21050046	TBC1D5 (-49366), SATB1 (+675187)	-6.54	6.167e-11	-5.459	4.79e-08	-5.485	4.128e-08	-3.522	0.0004277	-5.796	6.781e-09	-6.06	1.359e-09	-4.702	2.573e-06
Total SA	cg23346269	KRTAP20-4 (-737)	-5.759	8.478e-09	-4.942	7.729e-07	-4.338	1.436e-05	-4.963	6.941e-07	-4.7	2.596e-06	-5.057	4.267e-07	-3.82	0.0001333
Total SA	cg01305291	MTERF4 (+38633), SNED1 (+64824)	-5.737	9.622e-09	-5.35	8.811e-08	-4.975	6.538e-07	-4.549	5.401e-06	-5.755	8.672e-09	-5.03	4.917e-07	-5.151	2.589e-07
Total SA	cg03546806	LHX5 (-387431), RBM19 (+106803)	-5.689	1.276e-08	-4.85	1.237e-06	-4.428	9.509e-06	-5.241	1.599e-07	-5.648	1.628e-08	-4.206	2.6e-05	-3.075	0.002108
Total SA	cg26845363	FAM159A (-594)	-5.475	4.383e-08	-4.679	2.888e-06	-4.822	1.424e-06	-4.315	1.595e-05	-5.091	3.565e-07	-4.628	3.688e-06	-3.456	0.0005481
Total SA	cg27159031	AKT3 (-185860), ZBTB18 (-22141)	-5.207	1.918e-07	-4.456	8.352e-06	-5.014	5.334e-07	-4.564	5.03e-06	-4.026	5.673e-05	-4.195	2.73e-05	-3.974	7.078e-05
Total SA	cg07519471	PGLYRP1 (+222)	-5.182	2.196e-07	-5.351	8.725e-08	-4.569	4.896e-06	-2.472	0.01345	-4.781	1.745e-06	-4.377	1.204e-05	-3.96	7.508e-05
Total SA	cg05660634	THBS1 (-908184), RASGRP1 (-108103)	-5.118	3.093e-07	-4.125	3.713e-05	-4.689	2.749e-06	-4.766	1.879e-06	-4.949	7.464e-07	-4.517	6.277e-06	-2.554	0.01066
Total SA	cg20163478	ARHGAP27 (-756)	-5.095	3.49e-07	-4.753	2.007e-06	-4.348	1.375e-05	-3.955	7.641e-05	-4.516	6.296e-06	-5.557	2.742e-08	-3.063	0.002191
Total SA	cg04987734	AMN (+26881), CDC42BPB (+107925)	-5.03	4.904e-07	-4.324	1.53e-05	-4.434	9.255e-06	-4.54	5.63e-06	-4.012	6.025e-05	-3.56	0.0003703	-3.194	0.001401

## Sheet: Table S6
Table S6. Sensitivity and age-stratified analyses of FDR-significant CpGs associated with global measures in the discovery meta-analysis.
					Sensitivity analyses										Age-stratified analyses
Phenotype	CpG	Gene (distance to TSS)	Primary discovery analysis		Adjusted for ICV, in the whole sample		In male participants only		In female participants only		In case participants only		In healthy controls only		Late adolescence: N = 1629		Early adulthood: N = 1348		Mid adulthood: N = 1375		Late adulthood: N = 573
			Zscore	P.value	Zscore	P.value	Zscore	P.value	Zscore	P.value	Zscore	P.value	Zscore	P.value	Zscore	P.value	Zscore	P.value	Zscore	P.value	Zscore	P.value
Average CT	cg13518625	DUSP4 (-314655), SARAF (+417884)	5.831	5.51e-09	5.86	4.635e-09	3.781	0.0001559	3.827	0.0001295	2.62	0.008783	5.173	2.302e-07	4.573	4.8e-06	2.162	0.0306	3.666	0.000246	0.388648	0.681648
Average CT	cg03636183	F2RL3 (+915)	5.621	1.9e-08	5.727	1.025e-08	5.497	3.87e-08	1.91	0.05608	1.881	0.05992	4.601	4.195e-06	1.17	0.242	3.57	0.000358	5.741	9.4e-09	0.137293	0.677561
Average CT	cg12303084	ZMYND8 (-301)	5.554	2.788e-08	5.567	2.594e-08	4.046	5.209e-05	3.34	0.0008393	2.193	0.02834	4.771	1.838e-06	2.248	0.0246	3.154	0.00161	4.477	7.58e-06	0.720534	0.832621
Average CT	cg00024404	SERINC5 (-573)	5.413	6.197e-08	5.49	4.008e-08	5.159	2.478e-07	2.41	0.01595	3.767	0.0001653	3.677	0.0002356	2.199	0.0279	2.657	0.00788	2.943	0.00325	3.52725	0.913908
Average CT	cg21566642	ALPI (-36171), ALPG (+13109)	5.389	7.078e-08	5.431	5.607e-08	3.979	6.93e-05	3.509	0.0004491	1.978	0.04792	4.936	7.982e-07	2.802	0.00507	1.498	0.134	5.392	6.97e-08	0.423706	0.0122063
Average CT	cg10002435	FAAP100 (-57957), NPLOC4 (+26812)	-5.371	7.836e-08	-5.401	6.643e-08	-3.699	0.0002164	-3.728	0.000193	-3.21	0.001326	-4.367	1.262e-05	-2.878	0.00401	-3.586	0.000335	-2.6	0.00933	-1.36564	0.137437
Average CT	cg01764256	ZMYND8 (-392)	5.332	9.699e-08	5.432	5.564e-08	3.58	0.0003436	3.879	0.0001049	3.123	0.001791	3.961	7.451e-05	1.572	0.116	2.421	0.0155	4.855	1.21e-06	1.74739	0.777216
Average CT	cg02464519	RHOV (+8119), SPINT1 (+22152)	5.191	2.095e-07	5.099	3.406e-07	3.158	0.001586	3.74	0.0001838	1.313	0.1893	4.825	1.398e-06	3.658	0.000254	2.818	0.00483	2.044	0.0409	1.56051	0.80179
Average CT	cg01015663	ZNF436 (-33758), TCEA3 (+21540)	5.14	2.744e-07	5.255	1.479e-07	2.245	0.02474	0.233	0.816	0.35	0.7261	4.378	1.196e-05	4.31	1.63e-05	1.432	0.152	3.22	0.00128	0.619406	0.80046
Average CT	cg17034109	CYB561D1 (-318)	5.123	3.007e-07	5.094	3.502e-07	3.123	0.001791	3.72	0.0001994	1.932	0.0533	5.104	3.322e-07	3.757	0.000172	1.734	0.0829	3.442	0.000577	0.692845	0.454588
Average CT	cg05307394	TMEM17 (+122383), B3GNT2 (+187845)	5.108	3.261e-07	5.015	5.306e-07	3.339	0.0008399	4.138	3.506e-05	1.719	0.08566	4.868	1.125e-06	2.257	0.024	2.431	0.0151	4.472	7.75e-06	0.512617	0.41771
Average CT	cg12670943	POLDIP3 (+4426), SERHL2 (+56617)	-5.077	3.836e-07	-5.207	1.914e-07	-2.653	0.007971	-4.478	7.541e-06	-2.229	0.02579	-4.621	3.81e-06	-2.865	0.00417	-2.949	0.00319	-2.204	0.0275	-2.1153	0.190046
Average CT	cg15183129	LY9 (-6166), SLAMF7 (+50727)	-5.047	4.499e-07	-5.121	3.042e-07	-2.259	0.02389	-4.873	1.102e-06	-2.746	0.006033	-4.347	1.38e-05	-3.951	7.77e-05	-1.338	0.181	-2.214	0.0269	-2.65114	0.773081
Average CT	cg10802833	TNS3 (+200853)	-4.908	9.189e-07	-4.962	6.991e-07	-3.587	0.0003339	-3.081	0.002061	-3.392	0.0006941	-3.427	0.0006093	-1.944	0.052	-2.604	0.00921	-3.247	0.00117	-2.08918	0.643318
Average CT	cg19901969	DCUN1D3 (+34051), REXO5 (+59834)	4.901	9.538e-07	5.037	4.723e-07	3.274	0.00106	3.048	0.002304	1.406	0.1597	4.723	2.325e-06	2.957	0.0031	3.012	0.0026	2.903	0.0037	0.265789	0.972834
Average CT	cg00144480	SLC8A1 (-248080)	4.87	1.113e-06	4.84	1.301e-06	3.584	0.0003386	2.888	0.003876	3.246	0.001168	3.565	0.0003636	1.314	0.189	3.66	0.000252	3.472	0.000516	1.07214	0.363524
Average CT	cg02286809	CHSY1 (+162761), LRRK1 (+169956)	4.856	1.196e-06	4.643	3.427e-06	3.653	0.0002591	2.365	0.01805	1.712	0.08684	4.752	2.015e-06	4.221	2.43e-05	2.314	0.0207	2.352	0.0187	-0.0731634	0.0386384
Average CT	cg14495063	SHISA5 (-15373), PFKFB4 (+37086)	-4.822	1.423e-06	-4.649	3.34e-06	-3.269	0.001079	-3.271	0.001073	-3.629	0.000285	-3.299	0.0009716	-4.245	2.19e-05	-1.245	0.213	-2.33	0.0198	-1.46022	0.479005
Average CT	cg10587886	LMCD1 (-181559)	4.812	1.497e-06	4.712	2.455e-06	3.449	0.0005637	2.879	0.003991	2.025	0.04286	4.497	6.884e-06	2.26	0.0238	1.081	0.28	4.797	1.61e-06	1.2073	0.519437
Average CT	cg21998542	ITGB1 (-358280), NRP1 (+20088)	4.807	1.535e-06	4.858	1.185e-06	3.126	0.001775	3.432	0.0005995	0.648	0.5168	5.333	9.661e-08	3.206	0.00135	1.327	0.185	4.706	2.53e-06	-0.639197	0.680119
Average CT	cg14284211	TULP1 (-89510), FKBP5 (+126135)	4.806	1.541e-06	4.791	1.659e-06	4.26	2.048e-05	2.527	0.01152	2.601	0.009297	4.374	1.221e-05	4.002	6.28e-05	0.696	0.486	1.932	0.0534	3.28184	0.964162
Average CT	cg23695135	DNMT3A (-139112), DTNB (+191932)	-4.779	1.76e-06	-4.667	3.061e-06	-2.855	0.00431	-4.398	1.092e-05	-2.969	0.002986	-4.181	2.901e-05	-4.341	1.42e-05	-1.901	0.0573	-0.745	0.456	-2.62164	0.964699
Average CT	cg05525308	ZEB1 (-259600), ZNF438 (-27635)	4.763	1.908e-06	4.73	2.241e-06	3.376	0.0007363	2.803	0.005059	1.436	0.1511	4.994	5.911e-07	3.053	0.00227	1.114	0.265	3.619	0.000296	1.50299	0.149728
Average CT	cg00920892	BRF2 (-24803), RAB11FIP1 (+24747)	-4.753	2.002e-06	-4.645	3.394e-06	-2.782	0.005397	-4.382	1.174e-05	-1.344	0.1788	-4.81	1.506e-06	-5.743	9.31e-09	-1.613	0.107	-0.594	0.552	-0.858071	0.449179
Average CT	cg09010260	ITGA5 (-29241), GTSF1 (+23926)	4.747	2.069e-06	4.703	2.569e-06	3.953	7.711e-05	2.793	0.005224	2.08	0.03755	4.169	3.063e-05	2.289	0.0221	1.904	0.057	4.409	1.04e-05	0.306332	0.475035
Average CT	cg25563198	FKBP5 (-367)	4.729	2.259e-06	4.651	3.297e-06	2.801	0.005091	3.457	0.0005457	1.691	0.09083	4.305	1.669e-05	3.587	0.000334	3.018	0.00254	1.606	0.108	0.698503	0.0734759
Average CT	cg10961050	SMC5 (-212063), MAMDC2 (+3318)	4.727	2.281e-06	4.74	2.139e-06	2.289	0.02207	4.103	4.071e-05	0.771	0.441	5.181	2.21e-07	2.359	0.0183	3.557	0.000375	2.966	0.00302	-0.16994	0.788224
Average CT	cg16838957	SEC22A (+111630), ADCY5 (+129806)	-4.712	2.45e-06	-4.571	4.847e-06	-4.579	4.666e-06	-2.271	0.02315	-2.985	0.002832	-3.851	0.0001176	-2.742	0.00611	-1.759	0.0786	-2.934	0.00335	-1.94877	0.55608
Average CT	cg01115209	SLC24A5 (-157406), SEMA6D (+245077)	-4.712	2.454e-06	-4.706	2.526e-06	-2.735	0.006229	-3.944	8.012e-05	-3.163	0.001561	-3.556	0.0003772	-3.135	0.00172	-1.808	0.0706	-2.235	0.0254	-2.29284	0.267622
Average CT	cg17606266	ZNRF1 (-1980)	4.71	2.481e-06	4.603	4.173e-06	1.824	0.06815	4.377	1.202e-05	3.192	0.001415	3.342	0.0008321	3.34	0.000837	3.35	0.000809	1.508	0.132	0.701548	0.419112
Average CT	cg19787469	FOXL1 (+199882), FBXO31 (+605369)	4.7	2.599e-06	4.62	3.828e-06	4.788	1.681e-06	2.287	0.02221	1.943	0.05199	4.588	4.483e-06	2.473	0.0134	1.576	0.115	4.069	4.71e-05	0.888911	0.253831
Total SA	cg21050046	TBC1D5 (-49366), SATB1 (+675187)	-6.54	6.167e-11	-2.361	0.01825	-3.926	8.62e-05	-4.946	7.576e-07	-4.199	2.676e-05	-4.766	1.878e-06	-3.728	0.000193	-3.115	0.00184	-4.778	1.77e-06	-0.70621	0.480058
Total SA	cg23346269	KRTAP20-4 (-737)	-5.759	8.478e-09	-2.774	0.005534	-3.647	0.0002652	-4.011	6.036e-05	-2.521	0.01172	-4.477	7.562e-06	-3.108	0.00189	-3.44	0.000582	-2.245	0.0248	-2.88878	0.00386735
Total SA	cg01305291	MTERF4 (+38633), SNED1 (+64824)	-5.737	9.622e-09	-3.186	0.001442	-4.185	2.846e-05	-3.418	0.00063	-2.181	0.02916	-5.069	4.004e-07	-3.327	0.000878	-1.573	0.116	-4.832	1.35e-06	-1.31182	0.189581
Total SA	cg03546806	LHX5 (-387431), RBM19 (+106803)	-5.689	1.276e-08	-3.875	0.0001067	-3.395	0.0006858	-4.288	1.805e-05	-2.1	0.03571	-5.263	1.421e-07	-3.87	0.000109	-1.02	0.308	-3.971	7.16e-05	-2.43944	0.0147098
Total SA	cg26845363	FAM159A (-594)	-5.475	4.383e-08	-3.248	0.001163	-3.103	0.001913	-4.09	4.317e-05	-2.24	0.0251	-4.932	8.123e-07	-4.167	3.09e-05	-3.365	0.000766	-1.913	0.0558	-0.900224	0.368001
Total SA	cg27159031	AKT3 (-185860), ZBTB18 (-22141)	-5.207	1.918e-07	-1.375	0.1691	-4.36	1.302e-05	-2.051	0.04026	-3.794	0.0001485	-3.292	0.0009949	-5.176	2.27e-07	-1.789	0.0736	-1.719	0.0856	-1.13203	0.257623
Total SA	cg07519471	PGLYRP1 (+222)	-5.182	2.196e-07	-2.231	0.0257	-2.636	0.008395	-5.195	2.046e-07	-3.785	0.0001538	-3.801	0.0001439	-3.759	0.000171	-1.976	0.0482	-1.808	0.0706	-3.02282	0.00250431
Total SA	cg05660634	THBS1 (-908184), RASGRP1 (-108103)	-5.118	3.093e-07	-2.663	0.007745	-3.122	0.001799	-3.304	0.0009539	-4.421	9.823e-06	-3.67	0.0002424	-2.897	0.00376	-2.482	0.0131	-2.807	0.005	-1.96291	0.0496566
Total SA	cg20163478	ARHGAP27 (-756)	-5.095	3.49e-07	-2.995	0.002747	-3.466	0.0005287	-3.704	0.0002121	-2.743	0.006092	-4.377	1.204e-05	-2.444	0.0145	-2.464	0.0137	-2.798	0.00514	-2.70161	0.0069004
Total SA	cg04987734	AMN (+26881), CDC42BPB (+107925)	-5.03	4.904e-07	-3.127	0.001763	-2.735	0.006234	-4.074	4.612e-05	-2.26	0.02384	-3.997	6.409e-05	-2.122	0.0339	-2.238	0.0252	-3.929	8.55e-05	-1.6509	0.0987584

## Sheet: Table S7
Table S7. Differentially methylated regions (DMRs) associated with average CT and total SA identified using the comb-p Python module (hg19 reference genome).
Phenotype	chr	start	end	Direction of the effect size	min_p	n_probes	z_p	z_sidak_p	Gene
Average CT	1	3774827	3775335	+	3.387e-11	8	3.715e-19	4.691e-16	CEP104 (-1318), DFFB (+1236)
Average CT	20	45985736	45985833	+	3.387e-11	3	1.056e-16	7.342e-13	ZMYND8 (-371)
Total SA	17	1396001	1396124	-	6.158e-05	3	2.665e-06	0.0138	MYO1C (+43)
Total SA	12	6745244	6745708	-	5.186e-06	9	8.577e-14	1.187e-10	LPAR5 (+137)
Average CT	1	202310824	202311312	+	7.293e-06	8	1.198e-13	1.575e-10	UBE2T (+40)
Total SA	6	31691354	31691906	-	2.389e-06	15	6.097e-13	7.085e-10	LY6G6C (-2008), MPIG6B (+469)
Average CT	6	31691597	31692081	+	1.971e-06	10	1.216e-12	1.612e-09	LY6G6C (-2217), MPIG6B (+678)
Total SA	2	74875253	74875562	-	3.352e-07	8	3.335e-12	6.923e-09	M1AP (-244)
Average CT	11	86142407	86142588	-	1.848e-06	4	2.791e-11	9.892e-08	CCDC81 (+56564), ME3 (+241180)
Average CT	12	46660255	46660339	+	1.971e-06	3	3.225e-11	2.463e-07	SCAF11 (-275949), SLC38A1 (+2498)
Total SA	2	206628415	206628774	+	5.186e-06	9	1.018e-10	1.818e-07	NRP2 (+81371), INO80D (+322311)
Total SA	17	4401718	4401723	-	0.0006615	2	9.796e-08	0.01249	SPNS2 (-412)
Average CT	1	44399770	44399895	+	1.302e-05	5	5.073e-10	2.603e-06	ARTN (+841)
Total SA	17	4689640	4689766	-	0.0002801	5	2.843e-08	0.0001448	GLTPD2 (-2551), VMO1 (+24)
Average CT	6	71376554	71376643	-	1.51e-05	3	6.677e-10	4.813e-06	SMAP1 (-880)
Average CT	17	76354934	76355203	+	1.26e-05	4	6.958e-10	1.659e-06	SOCS3 (+1089), TMEM235 (+127085)
Average CT	16	596670	596705	+	2.732e-05	3	1.533e-09	2.809e-05	PIGQ (-23330), CAPN15 (+18832)
Average CT	5	79552470	79552538	+	2.893e-05	2	1.894e-09	1.787e-05	SERINC5 (-606)
Total SA	3	10149803	10150140	-	2.911e-05	8	2.851e-09	5.427e-06	BRK1 (-7304), FANCD2 (+81874)
Average CT	3	48557198	48557237	-	4.253e-05	2	2.917e-09	4.798e-05	SHISA5 (-15354), PFKFB4 (+37105)
Total SA	4	86935922	86936045	-	7.168e-05	2	3.706e-09	1.933e-05	MAPK10 (+345232), ARHGAP24 (+539717)
Total SA	6	31846924	31847010	-	1.347e-05	5	3.911e-09	2.917e-05	SLC44A4 (-189)
Average CT	13	51417923	51418111	+	3.12e-06	8	5.122e-09	1.748e-05	RNASEH2B (-65797), DLEU1 (+761710)
Total SA	17	4805931	4805987	-	0.001804	3	4.518e-07	0.005162	CHRNE (+410)
Average CT	6	30881560	30881809	+	1.864e-05	16	1.215e-08	3.13e-05	VARS2 (-423)
Average CT	1	160759689	160759782	-	0.0001579	2	1.378e-08	9.503e-05	LY9 (-6212), SLAMF7 (+50681)
Average CT	6	29454623	29454889	-	8.928e-05	5	1.479e-08	3.568e-05	MAS1L (+982)
Average CT	17	57915665	57915774	+	0.0002396	4	2.353e-08	0.0001385	TUBD1 (+54576), VMP1 (+130894)
Average CT	1	156551732	156551788	+	0.0002686	3	2.763e-08	0.0003165	APOA1BP (-9794), IQGAP3 (-9428)
Total SA	17	27369851	27370118	-	7.168e-05	4	6.186e-09	1.486e-05	PIPOX (+67)
Total SA	17	33842255	33842302	-	0.002218	2	6.579e-07	0.00894	SLFN12L (-27403), SLFN14 (+42838)
Average CT	3	177076825	177076828	+	0.0002833	2	3.003e-08	0.006401	TBL1XR1 (-162561)
Total SA	16	3005479	3005588	-	0.0003047	2	3.363e-08	0.0001979	KREMEN2 (-8411), FLYWCH1 (+43534)
Total SA	2	102608155	102608350	-	0.0002801	5	3.385e-08	0.0001113	IL1R2 (-53)
Average CT	14	81425912	81426016	-	0.000329	3	3.693e-08	0.0002278	TSHR (+4577), GTF2A1 (+261302)
Total SA	19	46526100	46526169	-	0.0003207	2	3.799e-08	0.0003531	PGLYRP1 (+188)
Average CT	14	103415873	103415883	-	0.000345	2	3.98e-08	0.00255	AMN (+26885), CDC42BPB (+107921)
Total SA	16	87781336	87781502	-	0.0003418	4	4.262e-08	0.0001647	KLHDC4 (+18136), JPH3 (+144908)
Total SA	3	131080483	131080698	-	0.0001471	5	4.687e-08	0.0001398	NUDT16 (-20038), NEK11 (+334864)
Total SA	9	35406604	35406765	-	0.0003789	2	4.902e-08	0.0001953	RUSC2 (-131944), UNC13B (+244626)
Average CT	6	34245268	34245342	-	0.0004153	2	4.92e-08	0.0004264	C6orf1 (-28058), NUDT3 (+115146)
Total SA	22	17956453	17956463	-	0.00198	3	5.87e-08	0.003759	CECR2 (-169)
Total SA	6	30860130	30860301	-	7.168e-05	6	6.336e-08	0.0002377	GTF2H4 (-15745), DDR1 (+8355)
Average CT	6	35696726	35696871	+	0.0005926	2	7.39e-08	0.0003269	FKBP5 (-439)
Total SA	17	34079665	34079999	-	2.389e-06	5	6.24e-15	1.194e-11	GAS2L2 (+65)
Average CT	12	57937334	57937409	-	0.001088	2	1.509e-07	0.00129	DCTN2 (+3552), MBD6 (+20845)
Total SA	6	32908567	32908719	-	0.001058	4	1.519e-07	0.0006408	HLA-DMB (+204)
Average CT	12	208632	208694	+	0.00113	2	1.608e-07	0.001662	IQSEC3 (+32732), SLC6A12 (+115026)
Total SA	1	3563954	3564032	-	0.001006	3	1.647e-07	0.001353	WRAP73 (+2644), TPRG1L (+22427)
Average CT	16	87866696	87866834	-	0.001145	3	1.749e-07	0.0008129	KLHDC4 (-67210), SLC7A5 (+36329)
Total SA	20	3218393	3218546	-	0.001058	4	2.005e-07	0.0008401	SLC4A11 (+342)
Total SA	1	205648187	205648337	-	0.001058	2	2.061e-07	0.0008812	ELK4 (-47172), SLC45A3 (+1325)
Average CT	17	2843206	2843258	-	0.001308	2	2.08e-07	0.002562	OR1D5 (+123669), RAP1GAP2 (+143500)
Total SA	17	37322431	37322541	-	0.0008859	3	2.311e-06	0.01338	ARL5C (+832)
Average CT	6	76203530	76203676	+	0.00133	6	2.266e-07	0.0009951	FILIP1 (-149)
Average CT	5	149887716	149887788	-	0.00133	2	2.302e-07	0.002049	NDST1 (+78)
Total SA	6	151560831	151561056	-	7.696e-05	6	2.439e-07	0.0006952	AKAP12 (-190)
Total SA	12	133179887	133180046	-	0.001201	4	2.639e-07	0.001064	P2RX2 (-15436), FBRSL1 (+113830)
Total SA	17	40192279	40192450	-	0.0003789	2	3.594e-06	0.01339	DNAJC7 (-22694), ZNF385C (+22710)
Total SA	20	3065343	3065560	-	1.347e-05	5	3.052e-07	0.0009019	AVP (-82)
Total SA	1	196578628	196578636	-	0.001396	2	3.22e-07	0.02549	KCNT2 (-277)
Average CT	4	206232	206340	+	0.001925	4	3.9e-07	0.002314	ZNF732 (+92824), ZNF595 (+153076)
Average CT	19	1265877	1266000	+	0.00196	3	4.063e-07	0.002117	C19orf24 (-9087), CIRBP (+6555)
Total SA	17	43508418	43508429	-	7.326e-06	2	1.713e-10	9.988e-06	ARHGAP27 (-5427), PLEKHM1 (+59686)
Total SA	7	151107934	151108106	-	0.0001619	4	4.316e-07	0.001609	NUB1 (+69223), RHEB (+108990)
Average CT	20	31331814	31331974	+	0.002104	4	4.494e-07	0.0018	COMMD7 (-91)
Total SA	17	44249491	44249867	cg02301815 (+); cg26855231, cg07799891, cg14374015, and cg19832721 (-)	0.002373	5	5.927e-10	1.011e-06	KANSL1 (+20487), STH (+173063)
Total SA	21	18985610	18985762	-	0.001804	5	4.556e-07	0.001921	BTG3 (-524)
Total SA	13	114817820	114817961	-	0.00198	2	5.486e-07	0.002493	GAS6 (-250851), RASA3 (+80195)
Total SA	2	45398004	45398105	-	0.00198	3	5.493e-07	0.003483	SIX2 (-161486), SRBD1 (+440365)
Average CT	6	151258337	151258452	-	0.00257	2	5.81e-07	0.003236	AKAP12 (-302739), MTHFD1L (+71710)
Total SA	6	57038202	57038232	-	0.002067	3	5.863e-07	0.01246	BAG2 (+1093), RAB23 (+48861)
Total SA	2	86038423	86038590	-	0.002109	3	6.083e-07	0.002334	ATOH8 (+57490), ST3GAL5 (+77630)
Total SA	12	96251729	96251789	-	0.002218	2	6.535e-07	0.006963	SNRPF (-947)
Total SA	17	44292685	44292829	+	0.0002801	3	2.882e-08	0.0001284	LRRC37A (-79740), KANSL1 (-22591)
Total SA	3	112013130	112013232	-	0.002218	3	6.716e-07	0.004215	SLC9C1 (-76)
Total SA	11	94966206	94966336	-	0.002218	2	6.741e-07	0.003321	SESN3 (-1910)
Total SA	3	135684161	135684236	-	0.002854	3	6.82e-07	0.005816	PPP2R3A (-316)
Average CT	5	138211013	138211185	+	0.002889	7	6.89e-07	0.002567	LRRTM2 (-120)
Total SA	11	78614359	78614523	-	0.001197	2	6.926e-07	0.002706	NARS2 (-328532), TENM4 (+537254)
Total SA	2	286998	287149	-	0.002283	4	7.185e-07	0.003048	FAM150B (+1222), ACP1 (+22205)
Total SA	19	49055390	49055444	-	0.002283	5	7.26e-07	0.008588	SULT2B1 (+85)
Average CT	8	11706208	11706361	-	0.002968	3	7.265e-07	0.003041	CTSB (+19453), FDFT1 (+46165)
Average CT	12	71113067	71113150	+	0.003054	2	7.569e-07	0.005833	PTPRB (-81889), PTPRR (+201514)
Total SA	10	134231487	134231550	-	0.002455	3	8.249e-07	0.008365	INPP5A (-119805), PWWP2B (+20847)
Average CT	10	101282726	101282884	+	0.003491	4	9.143e-07	0.003705	GOT1 (-92455), NKX2-3 (-9885)
Average CT	19	18133156	18133185	+	0.003491	2	9.159e-07	0.02006	MAST3 (-75432), ARRDC2 (+14194)
Total SA	19	46801557	46801673	-	0.002648	4	9.289e-07	0.005124	PPP5C (-48636), HIF3A (+1312)
Total SA	1	158799935	158800025	-	0.002668	2	9.499e-07	0.006748	MNDA (-1127)
Total SA	4	36258130	36258206	-	0.002668	2	9.524e-07	0.008006	DTHD1 (-27476), ARAP2 (-12037)
Total SA	1	150780684	150780800	-	0.002923	3	1.08e-06	0.005952	CTSK (+57)
Total SA	19	37825307	37825456	-	0.0006294	6	1.093e-06	0.004695	HKR1 (-198)
Average CT	11	76380921	76381082	+	0.001004	4	1.111e-06	0.004418	LRRC32 (+42)
Total SA	19	7293270	7293342	-	0.00331	2	1.295e-06	0.01147	INSR (+739)
Total SA	11	259533	259555	-	0.003339	2	1.317e-06	0.03768	NLRP6 (-19026), PSMD13 (+22567)
Total SA	16	88766501	88766539	-	0.003446	3	1.386e-06	0.02312	SNAI3 (-13619), RNF166 (+6309)
Average CT	22	26859954	26859982	-	0.005246	2	1.513e-06	0.03407	HPS4 (+19810), ASPHD2 (+34729)
Average CT	7	50791421	50791509	+	0.005458	2	1.608e-06	0.01166	DDC (-158311), GRB10 (+8585)
Average CT	7	47420887	47420962	-	0.005474	2	1.633e-06	0.01387	TNS3 (+158274)
Total SA	6	166190016	166190135	-	0.00408	3	1.698e-06	0.009111	PDE10A (-114519), SDIM1 (+119649)
Average CT	10	73976790	73976900	+	0.005474	4	1.698e-06	0.009855	ASCC1 (-812)
Average CT	11	117069780	117069892	+	0.0008566	4	1.808e-06	0.0103	TAGLN (-2753)
Average CT	12	133133512	133133573	-	0.00577	2	1.835e-06	0.01911	P2RX2 (-61860), FBRSL1 (+67406)
Average CT	20	61002711	61002867	-	0.001145	4	1.868e-06	0.007654	RBBP8NL (-200)
Total SA	1	217263805	217263848	-	0.004493	2	1.94e-06	0.02852	ESRRG (-367032), GPATCH2 (+540597)
Total SA	9	132383353	132383437	-	0.004713	3	2.101e-06	0.01592	NTMT1 (+12232), ASB6 (+21049)
Total SA	17	58499679	58499855	-	7.647e-05	6	2.215e-07	0.0008071	USP32 (-30272), APPBP2 (+103813)
Average CT	16	54404353	54404409	+	0.0006769	2	2.313e-06	0.02614	IRX5 (-560393), IRX3 (-83706)
Total SA	8	141229379	141229478	-	0.005252	2	2.386e-06	0.01534	TRAPPC9 (+239249), C8orf17 (+286013)
Total SA	16	857454	857577	-	0.005252	2	2.399e-06	0.01244	GNG13 (-6783), LMF1 (+163483)
Total SA	10	95479311	95479366	-	0.005367	2	2.482e-06	0.02853	LGI1 (-38303), FRA10AC1 (-17010)
Total SA	16	8814411	8814508	-	0.00546	3	2.579e-06	0.01691	ABAT (+7634), TMEM186 (+77045)
Total SA	10	112256018	112256146	-	0.00546	2	2.579e-06	0.01284	DUSP5 (-1514)
Total SA	12	22486437	22486485	-	0.005551	3	2.658e-06	0.0349	ST8SIA1 (+1187), CMAS (+287353)
Total SA	17	72462537	72462692	-	0.005551	4	2.717e-06	0.01118	CD300A (+60)
Total SA	17	79466077	79466161	-	0.001272	2	2.835e-07	0.002163	TMEM105 (-161645), ACTG1 (+13688)
Total SA	13	113242997	113243142	-	0.001101	4	2.822e-06	0.01241	TUBGCP3 (-589)
Total SA	11	63827879	63828040	-	0.005815	2	2.928e-06	0.0116	FLRT1 (-42700), OTUB1 (+74075)
Average CT	6	164506829	164506982	+	0.00133	4	3.014e-06	0.01256	QKI (+671231)
Average CT	7	1250088	1250259	+	0.001505	5	3.107e-06	0.01159	ZFAND2A (-50360), UNCX (-22369)
Average CT	4	75097045	75097155	+	0.008627	2	3.209e-06	0.01854	EPGN (-77090), MTHFD2L (+73271)
Total SA	17	79678105	79678159	-	0.001763	2	4.206e-07	0.004985	SLC25A10 (-1205)
Average CT	8	11666485	11666595	-	0.009419	5	3.612e-06	0.02085	FDFT1 (+6420), CTSB (+59198)
Total SA	7	154990228	154990286	+	0.00692	2	3.646e-06	0.03952	INSIG1 (-99229), HTR5A (+128223)
Total SA	14	104165401	104165476	-	0.003287	2	3.662e-06	0.03084	XRCC3 (+13002), KLC1 (+69861)
Total SA	2	159651808	159651919	-	0.004435	3	3.802e-06	0.02173	DAPL1 (+35)
Average CT	6	30882994	30883075	+	0.0004206	3	3.807e-06	0.0297	VARS2 (+927)
Total SA	5	58653624	58653739	-	0.007033	3	3.849e-06	0.02124	PDE4D (+535943), RAB3C (+774815)
Total SA	1	86044103	86044231	-	0.007033	4	3.857e-06	0.01914	CYR61 (-2277)
Total SA	8	142288216	142288271	-	0.007179	2	3.974e-06	0.0453	SLC45A4 (-49571), GPR20 (+89123)
Total SA	1	160759689	160759782	-	0.007179	2	3.995e-06	0.02718	LY9 (-6212), SLAMF7 (+50681)
Total SA	16	30907560	30907680	-	0.007563	2	4.247e-06	0.02245	BCL7C (-1339), CTF1 (-308)
Total SA	14	100141862	100141934	-	0.00759	3	4.307e-06	0.03765	CYP46A1 (-8753), HHIPL1 (+30451)
Total SA	9	100317703	100317795	-	0.007681	2	4.394e-06	0.03017	TMOD1 (+53828), TSTD2 (+78108)
Total SA	19	16764813	16764884	+	0.008388	2	4.851e-06	0.04288	MED26 (-25832), SMIM7 (+6119)
Total SA	3	42977889	42978027	-	0.0007056	4	5.223e-06	0.02399	KRBOX1 (-396), ENSG00000273291 (-393)
Total SA	7	55605845	55605954	-	0.009971	2	6.049e-06	0.03497	VOPP1 (+34318), LANCL2 (+172759)
Total SA	11	86085932	86086102	-	0.001155	3	6.062e-06	0.02261	CCDC81 (+83)
Average CT	10	65280618	65280767	+	0.001145	3	1.183e-05	0.04964	REEP3 (-430)

## Sheet: Table S8
Table S8. Chromatin state enrichment of CpGs associated with average CT and total SA (P < 1 × 10-5; NCT-associated CpGs = 68; NSA-associated CpGs = 52) across 10 brain tissues, using 15-state chromatin models from the NIH Roadmap Epigenomics Project. Enrichment ratios are calculated using hypergeometric test, with FDR-adjudted P-values computed within each tissue.
Phenotype	EIDs	Tissue	Chromatin_State	Observed	Background	Odd ratio	p-value	PFDR
Average CT	E067	Brain Angular Gyrus	1_TssA	2	117926	0.148405	9.21442e-05	0.00138216
Average CT	E068	Brain Anterior Caudate	2_TssAFlnk	12	32425	3.23854	0.000285868	0.00428802
Average CT	E073	Brain Dorsolateral Prefrontal Cortex	2_TssAFlnk	10	24984	3.5025	0.000531346	0.00797019
Average CT	E071	Brain Hippocampus Middle	2_TssAFlnk	12	36204	2.90059	0.000764583	0.0114687
Average CT	E072	Brain Inferior Temporal Lobe	1_TssA	3	112155	0.23407	0.00092478	0.0138717
Average CT	E067	Brain Angular Gyrus	2_TssAFlnk	9	23226	3.39075	0.0012906	0.00967952
Average CT	E068	Brain Anterior Caudate	1_TssA	4	122196	0.286451	0.00137164	0.0102873
Average CT	E069	Brain Cingulate Gyrus	1_TssA	3	108374	0.242231	0.0014056	0.0210839
Average CT	E073	Brain Dorsolateral Prefrontal Cortex	1_TssA	4	117158	0.298764	0.00207562	0.0155672
Average CT	E081	Fetal Brain Male	1_TssA	0	55404	0	0.0025716	0.038574
Average CT	E082	Fetal Brain Female	1_TssA	3	101727	0.258053	0.00318822	0.0478232
Average CT	E067	Brain Angular Gyrus	7_Enh	12	43422	2.41824	0.00354127	0.0177064
Average CT	E082	Fetal Brain Female	2_TssAFlnk	8	25283	2.76876	0.00810823	0.0608117
Average CT	E069	Brain Cingulate Gyrus	2_TssAFlnk	9	30965	2.54335	0.00854539	0.051336
Average CT	E069	Brain Cingulate Gyrus	7_Enh	12	46879	2.23994	0.0102672	0.051336
Average CT	E074	Brain Substantia Nigra	1_TssA	5	111390	0.392799	0.0124822	0.185738
Average CT	E071	Brain Hippocampus Middle	13_ReprPC	6	17502	3.00003	0.0149864	0.112398
Total SA	E071	Brain Hippocampus Middle	11_BivFlnk	4	11269	4.06202	0.0169389	0.189821
Average CT	E070	Brain Germinal Matrix	2_TssAFlnk	8	29314	2.38834	0.0184276	0.211158
Average CT	E073	Brain Dorsolateral Prefrontal Cortex	7_Enh	10	40402	2.16589	0.024535	0.122675
Average CT	E074	Brain Substantia Nigra	2_TssAFlnk	7	25178	2.4329	0.024765	0.185738
Total SA	E071	Brain Hippocampus Middle	6_EnhG	3	7209	4.76227	0.0253094	0.189821
Average CT	E072	Brain Inferior Temporal Lobe	2_TssAFlnk	8	32189	2.17483	0.0301214	0.175242
Average CT	E081	Fetal Brain Male	14_ReprPCWk	12	56546	1.85714	0.0348496	0.261372
Average CT	E072	Brain Inferior Temporal Lobe	7_Enh	10	44700	1.95766	0.0350484	0.175242
Average CT	E071	Brain Hippocampus Middle	9_Het	2	2767	6.32533	0.0402677	0.201339
Average CT	E070	Brain Germinal Matrix	1_TssA	3	75102	0.349584	0.0425652	0.211158
Total SA	E070	Brain Germinal Matrix	6_EnhG	2	3742	6.11665	0.0426405	0.378431
Average CT	E074	Brain Substantia Nigra	14_ReprPCWk	11	52089	1.84796	0.0483293	0.241646
Average CT	E068	Brain Anterior Caudate	13_ReprPC	4	12119	2.88829	0.0502144	0.251072
Total SA	E070	Brain Germinal Matrix	14_ReprPCWk	9	54115	1.90332	0.0504575	0.378431
Total SA	E082	Fetal Brain Female	12_EnhBiv	2	4164	5.49603	0.0516036	0.567251
Total SA	E069	Brain Cingulate Gyrus	2_TssAFlnk	6	30965	2.21728	0.0522915	0.428283
Average CT	E070	Brain Germinal Matrix	10_TssBiv	0	32698	0	0.0540114	0.211158
Average CT	E070	Brain Germinal Matrix	7_Enh	8	33507	2.08947	0.0563089	0.211158
Total SA	E069	Brain Cingulate Gyrus	12_EnhBiv	2	4410	5.18957	0.0571043	0.428283
Total SA	E081	Fetal Brain Male	6_EnhG	1	689	16.6093	0.0585432	0.548371
Total SA	E073	Brain Dorsolateral Prefrontal Cortex	10_TssBiv	3	11045	3.10814	0.0723044	0.521718
Average CT	E067	Brain Angular Gyrus	14_ReprPCWk	10	49333	1.77374	0.0729979	0.273742
Total SA	E073	Brain Dorsolateral Prefrontal Cortex	4_Tx	0	35389	0	0.0747829	0.521718
Total SA	E074	Brain Substantia Nigra	10_TssBiv	2	5350	4.27788	0.0798419	1
Total SA	E068	Brain Anterior Caudate	3_TxFlnk	1	978	11.7008	0.0820557	0.883075
Average CT	E082	Fetal Brain Female	12_EnhBiv	2	4164	4.20285	0.0824711	0.382005
Total SA	E081	Fetal Brain Male	1_TssA	1	55404	0.206552	0.0885713	0.548371
Total SA	E082	Fetal Brain Female	1_TssA	4	101727	0.449939	0.0943653	0.567251
Average CT	E082	Fetal Brain Female	14_ReprPCWk	9	45169	1.74352	0.101868	0.382005
Total SA	E067	Brain Angular Gyrus	7_Enh	7	43422	1.84468	0.102003	0.897516
Total SA	E069	Brain Cingulate Gyrus	6_EnhG	2	6199	3.69189	0.102382	0.511912
Total SA	E081	Fetal Brain Male	8_ZNF/Rpts	2	6462	3.54188	0.109674	0.548371
Total SA	E073	Brain Dorsolateral Prefrontal Cortex	6_EnhG	2	6521	3.50963	0.111343	0.521718
Total SA	E082	Fetal Brain Female	14_ReprPCWk	7	45169	1.77332	0.11345	0.567251
Average CT	E072	Brain Inferior Temporal Lobe	13_ReprPC	4	16707	2.0951	0.124209	0.465782
Average CT	E081	Fetal Brain Male	7_Enh	12	68201	1.53977	0.124407	0.622035
Total SA	E072	Brain Inferior Temporal Lobe	6_EnhG	2	7104	3.22164	0.128064	0.851134
Total SA	E067	Brain Angular Gyrus	2_TssAFlnk	4	23226	1.97069	0.14471	0.897516
Average CT	E071	Brain Hippocampus Middle	1_TssA	7	104776	0.584653	0.149737	0.561516
Total SA	E070	Brain Germinal Matrix	12_EnhBiv	2	7899	2.89765	0.15172	0.758598
Total SA	E073	Brain Dorsolateral Prefrontal Cortex	7_Enh	6	40402	1.69939	0.165248	0.521718
Total SA	E073	Brain Dorsolateral Prefrontal Cortex	2_TssAFlnk	4	24984	1.83208	0.173906	0.521718
Total SA	E067	Brain Angular Gyrus	12_EnhBiv	1	2271	5.03867	0.180387	0.897516
Total SA	E081	Fetal Brain Male	12_EnhBiv	5	29776	1.92165	0.186994	0.648931
Average CT	E082	Fetal Brain Female	10_TssBiv	0	22476	0	0.187182	0.473984
Average CT	E072	Brain Inferior Temporal Lobe	14_ReprPCWk	9	51189	1.53854	0.188837	0.566511
Average CT	E082	Fetal Brain Female	15_Quies	26	182967	1.24344	0.189594	0.473984
Average CT	E081	Fetal Brain Male	2_TssAFlnk	5	22933	1.90798	0.190664	0.700478
Average CT	E074	Brain Substantia Nigra	7_Enh	9	51827	1.51961	0.192653	0.722448
Average CT	E071	Brain Hippocampus Middle	6_EnhG	2	7209	2.42782	0.199431	0.598294
Total SA	E068	Brain Anterior Caudate	2_TssAFlnk	5	32425	1.76459	0.206596	0.883075
Total SA	E072	Brain Inferior Temporal Lobe	9_Het	1	2748	4.16421	0.213981	0.851134
Total SA	E081	Fetal Brain Male	5_TxWk	6	114650	0.598892	0.21631	0.648931
Average CT	E070	Brain Germinal Matrix	12_EnhBiv	2	7899	2.21585	0.228264	0.594251
Total SA	E073	Brain Dorsolateral Prefrontal Cortex	14_ReprPCWk	7	53614	1.49405	0.230043	0.575108
Average CT	E073	Brain Dorsolateral Prefrontal Cortex	9_Het	1	2356	3.7142	0.236522	0.886957
Total SA	E082	Fetal Brain Female	11_BivFlnk	2	10598	2.15941	0.236887	0.767544
Total SA	E072	Brain Inferior Temporal Lobe	10_TssBiv	2	10607	2.15768	0.237162	0.851134
Average CT	E070	Brain Germinal Matrix	15_Quies	25	180073	1.21499	0.237701	0.594251
Total SA	E071	Brain Hippocampus Middle	2_TssAFlnk	5	36204	1.58045	0.246422	0.990361
Total SA	E068	Brain Anterior Caudate	11_BivFlnk	1	3330	3.43644	0.25315	0.883075
Average CT	E081	Fetal Brain Male	10_TssBiv	1	2559	3.41976	0.254087	0.700478
Total SA	E082	Fetal Brain Female	6_EnhG	1	3371	3.39446	0.255848	0.767544
Total SA	E069	Brain Cingulate Gyrus	4_Tx	1	37887	0.30203	0.259835	0.84016
Total SA	E072	Brain Inferior Temporal Lobe	4_Tx	1	40333	0.283719	0.262867	0.851134
Total SA	E071	Brain Hippocampus Middle	4_Tx	1	40770	0.28069	0.264096	0.990361
Total SA	E068	Brain Anterior Caudate	4_Tx	1	40992	0.27916	0.264805	0.883075
Average CT	E072	Brain Inferior Temporal Lobe	9_Het	1	2748	3.1844	0.270105	0.675264
Total SA	E074	Brain Substantia Nigra	12_EnhBiv	1	3629	3.1533	0.272523	1
Total SA	E069	Brain Cingulate Gyrus	1_TssA	6	108374	0.633528	0.280053	0.84016
Average CT	E081	Fetal Brain Male	5_TxWk	9	114650	0.686964	0.280191	0.700478
Average CT	E082	Fetal Brain Female	4_Tx	3	53265	0.492837	0.283602	0.607719
Total SA	E072	Brain Inferior Temporal Lobe	7_Enh	6	44700	1.53601	0.283711	0.851134
Total SA	E068	Brain Anterior Caudate	15_Quies	19	178780	1.21615	0.294358	0.883075
Total SA	E067	Brain Angular Gyrus	1_TssA	7	117926	0.679238	0.298965	0.897516
Average CT	E071	Brain Hippocampus Middle	14_ReprPCWk	4	59693	0.586406	0.315977	0.789942
Total SA	E067	Brain Angular Gyrus	6_EnhG	1	4363	2.6227	0.318025	0.897516
Average CT	E073	Brain Dorsolateral Prefrontal Cortex	12_EnhBiv	1	3393	2.57903	0.322228	0.966685
Average CT	E072	Brain Inferior Temporal Lobe	4_Tx	2	40333	0.433924	0.32864	0.704228
Average CT	E067	Brain Angular Gyrus	5_TxWk	8	100642	0.695566	0.331024	0.993071
Average CT	E068	Brain Anterior Caudate	4_Tx	2	40992	0.426951	0.331027	1
Total SA	E074	Brain Substantia Nigra	6_EnhG	1	4602	2.4866	0.332215	1
Total SA	E081	Fetal Brain Male	11_BivFlnk	1	4668	2.45155	0.336073	0.840183
Total SA	E082	Fetal Brain Female	13_ReprPC	4	30447	1.5033	0.340392	0.850979
Total SA	E071	Brain Hippocampus Middle	15_Quies	17	157736	1.23335	0.345289	1
Total SA	E070	Brain Germinal Matrix	9_Het	1	4928	2.32229	0.351096	0.887996
Total SA	E069	Brain Cingulate Gyrus	14_ReprPCWk	7	59628	1.34335	0.358452	0.84024
Total SA	E067	Brain Angular Gyrus	5_TxWk	6	100642	0.68219	0.359006	0.897516
Total SA	E072	Brain Inferior Temporal Lobe	2_TssAFlnk	4	32189	1.42201	0.365184	0.91296
Average CT	E070	Brain Germinal Matrix	4_Tx	3	48985	0.535969	0.373765	0.800924
Total SA	E069	Brain Cingulate Gyrus	11_BivFlnk	1	5668	2.01888	0.392112	0.84024
Average CT	E073	Brain Dorsolateral Prefrontal Cortex	14_ReprPCWk	8	53614	1.30573	0.395761	0.989402
Total SA	E070	Brain Germinal Matrix	1_TssA	4	75102	0.609531	0.401779	0.887996
Total SA	E073	Brain Dorsolateral Prefrontal Cortex	13_ReprPC	0	16473	0	0.406421	0.849671
Average CT	E069	Brain Cingulate Gyrus	10_TssBiv	0	12628	0	0.408047	1
Average CT	E071	Brain Hippocampus Middle	10_TssBiv	0	12767	0	0.408237	0.874793
Total SA	E068	Brain Anterior Caudate	6_EnhG	1	6195	1.84719	0.419731	1
Average CT	E081	Fetal Brain Male	13_ReprPC	2	34480	0.507608	0.438879	0.940456
Total SA	E070	Brain Germinal Matrix	4_Tx	2	48985	0.467255	0.442266	0.887996
Total SA	E072	Brain Inferior Temporal Lobe	15_Quies	18	175609	1.17294	0.44751	0.935645
Total SA	E082	Fetal Brain Female	10_TssBiv	3	22476	1.52733	0.448444	0.960951
Total SA	E073	Brain Dorsolateral Prefrontal Cortex	15_Quies	13	181213	0.820918	0.453158	0.849671
Total SA	E081	Fetal Brain Male	15_Quies	19	187170	1.16169	0.455915	0.976961
Total SA	E074	Brain Substantia Nigra	7_Enh	6	51827	1.32479	0.455935	1
Total SA	E074	Brain Substantia Nigra	14_ReprPCWk	6	52089	1.31813	0.457487	1
Total SA	E070	Brain Germinal Matrix	13_ReprPC	3	24071	1.42631	0.468643	0.887996
Total SA	E067	Brain Angular Gyrus	10_TssBiv	1	7395	1.54737	0.478145	0.929917
Average CT	E071	Brain Hippocampus Middle	5_TxWk	7	84797	0.722403	0.48599	0.875836
Average CT	E068	Brain Anterior Caudate	7_Enh	7	46810	1.3086	0.493933	1
Average CT	E069	Brain Cingulate Gyrus	15_Quies	22	168461	1.14277	0.500801	1
Average CT	E072	Brain Inferior Temporal Lobe	5_TxWk	8	91330	0.766514	0.502404	0.868278
Average CT	E069	Brain Cingulate Gyrus	13_ReprPC	3	20376	1.28836	0.506564	1
Average CT	E068	Brain Anterior Caudate	15_Quies	23	178780	1.12579	0.509267	1
Total SA	E070	Brain Germinal Matrix	2_TssAFlnk	1	29314	0.390402	0.52029	0.887996
Total SA	E067	Brain Angular Gyrus	4_Tx	1	30719	0.3725	0.523903	0.929917
Total SA	E074	Brain Substantia Nigra	4_Tx	1	31365	0.364844	0.526339	1
Total SA	E070	Brain Germinal Matrix	10_TssBiv	4	32698	1.39999	0.532798	0.887996
Total SA	E069	Brain Cingulate Gyrus	15_Quies	17	168461	1.15475	0.53792	0.942408
Total SA	E081	Fetal Brain Male	13_ReprPC	4	34480	1.32759	0.544105	1
Average CT	E082	Fetal Brain Female	7_Enh	4	26627	1.3145	0.548661	1
Total SA	E067	Brain Angular Gyrus	15_Quies	19	195420	1.11255	0.55795	0.929917
Average CT	E072	Brain Inferior Temporal Lobe	6_EnhG	1	7104	1.2318	0.558144	0.868278
Total SA	E072	Brain Inferior Temporal Lobe	5_TxWk	6	91330	0.751774	0.565075	0.935645
Total SA	E069	Brain Cingulate Gyrus	5_TxWk	6	89857	0.764081	0.565445	0.942408
Average CT	E071	Brain Hippocampus Middle	15_Quies	20	157736	1.10959	0.583793	0.875836
Total SA	E071	Brain Hippocampus Middle	1_TssA	7	104776	0.764546	0.584082	1
Average CT	E081	Fetal Brain Male	12_EnhBiv	4	29776	1.1756	0.584097	1
Total SA	E068	Brain Anterior Caudate	14_ReprPCWk	2	41911	0.546078	0.584431	1
Average CT	E067	Brain Angular Gyrus	4_Tx	2	30719	0.569706	0.585525	1
Average CT	E068	Brain Anterior Caudate	10_TssBiv	1	7727	1.1325	0.588873	1
Average CT	E072	Brain Inferior Temporal Lobe	15_Quies	22	175609	1.09628	0.596695	0.868278
Total SA	E072	Brain Inferior Temporal Lobe	1_TssA	8	112155	0.816245	0.599082	0.935645
Total SA	E073	Brain Dorsolateral Prefrontal Cortex	1_TssA	8	117158	0.781383	0.599954	0.999923
Total SA	E072	Brain Inferior Temporal Lobe	14_ReprPCWk	3	51189	0.670647	0.623764	0.935645
Total SA	E071	Brain Hippocampus Middle	7_Enh	3	51286	0.669407	0.623765	1
Average CT	E071	Brain Hippocampus Middle	4_Tx	3	40770	0.643936	0.628983	0.875836
Total SA	E068	Brain Anterior Caudate	13_ReprPC	0	12119	0	0.629161	1
Total SA	E069	Brain Cingulate Gyrus	10_TssBiv	0	12628	0	0.630424	0.945635
Total SA	E071	Brain Hippocampus Middle	10_TssBiv	0	12767	0	0.630873	1
Total SA	E081	Fetal Brain Male	14_ReprPCWk	6	56546	1.21429	0.63253	1
Average CT	E072	Brain Inferior Temporal Lobe	10_TssBiv	0	10607	0	0.636737	0.868278
Average CT	E073	Brain Dorsolateral Prefrontal Cortex	10_TssBiv	0	11045	0	0.640267	1
Average CT	E071	Brain Hippocampus Middle	11_BivFlnk	0	11269	0	0.64228	0.875836
Total SA	E074	Brain Substantia Nigra	13_ReprPC	0	15330	0	0.646064	1
Total SA	E070	Brain Germinal Matrix	15_Quies	14	180073	0.889748	0.653688	0.959456
Average CT	E070	Brain Germinal Matrix	14_ReprPCWk	7	54115	1.13204	0.672646	1
Average CT	E073	Brain Dorsolateral Prefrontal Cortex	15_Quies	19	181213	0.917497	0.694973	1
Average CT	E074	Brain Substantia Nigra	13_ReprPC	2	15330	1.14165	0.69518	1
Average CT	E081	Fetal Brain Male	15_Quies	23	187170	1.07537	0.695736	1
Average CT	E067	Brain Angular Gyrus	13_ReprPC	2	15832	1.10541	0.702961	1
Total SA	E070	Brain Germinal Matrix	11_BivFlnk	2	20777	1.10163	0.703601	0.959456
Average CT	E073	Brain Dorsolateral Prefrontal Cortex	13_ReprPC	2	16473	1.06242	0.713027	1
Total SA	E074	Brain Substantia Nigra	1_TssA	8	111390	0.821857	0.721552	1
Total SA	E081	Fetal Brain Male	2_TssAFlnk	1	22933	0.499011	0.723976	1
Average CT	E070	Brain Germinal Matrix	11_BivFlnk	1	20777	0.42121	0.733962	1
Average CT	E074	Brain Substantia Nigra	5_TxWk	9	94467	0.833699	0.739216	1
Average CT	E070	Brain Germinal Matrix	13_ReprPC	3	24071	1.09071	0.755728	1
Total SA	E069	Brain Cingulate Gyrus	7_Enh	3	46879	0.73229	0.796928	1
Average CT	E073	Brain Dorsolateral Prefrontal Cortex	4_Tx	3	35389	0.741811	0.798676	1
Average CT	E068	Brain Anterior Caudate	14_ReprPCWk	5	41911	1.04397	0.812967	1
Total SA	E071	Brain Hippocampus Middle	14_ReprPCWk	4	59693	0.766839	0.816386	1
Total SA	E082	Fetal Brain Female	5_TxWk	6	80493	0.852948	0.839875	1
Total SA	E073	Brain Dorsolateral Prefrontal Cortex	5_TxWk	9	96955	1.06223	0.8507	1
Average CT	E069	Brain Cingulate Gyrus	5_TxWk	9	89857	0.876445	0.865118	1
Average CT	E073	Brain Dorsolateral Prefrontal Cortex	5_TxWk	10	96955	0.902547	0.869679	1
Average CT	E068	Brain Anterior Caudate	5_TxWk	10	95378	0.917486	0.869706	1
Total SA	E082	Fetal Brain Female	15_Quies	15	182967	0.938098	0.880836	1
Average CT	E067	Brain Angular Gyrus	15_Quies	23	195420	1.02988	0.897413	1
Average CT	E067	Brain Angular Gyrus	10_TssBiv	0	7395	0	1	1
Average CT	E067	Brain Angular Gyrus	11_BivFlnk	0	1829	0	1	1
Average CT	E067	Brain Angular Gyrus	12_EnhBiv	0	2271	0	1	1
Average CT	E067	Brain Angular Gyrus	3_TxFlnk	0	452	0	1	1
Average CT	E067	Brain Angular Gyrus	6_EnhG	0	4363	0	1	1
Average CT	E067	Brain Angular Gyrus	8_ZNF/Rpts	0	591	0	1	1
Average CT	E067	Brain Angular Gyrus	9_Het	0	1606	0	1	1
Average CT	E068	Brain Anterior Caudate	11_BivFlnk	0	3330	0	1	1
Average CT	E068	Brain Anterior Caudate	12_EnhBiv	0	2558	0	1	1
Average CT	E068	Brain Anterior Caudate	3_TxFlnk	0	978	0	1	1
Average CT	E068	Brain Anterior Caudate	6_EnhG	0	6195	0	1	1
Average CT	E068	Brain Anterior Caudate	8_ZNF/Rpts	0	932	0	1	1
Average CT	E068	Brain Anterior Caudate	9_Het	0	2723	0	1	1
Average CT	E069	Brain Cingulate Gyrus	14_ReprPCWk	6	59628	0.880512	1	1
Average CT	E069	Brain Cingulate Gyrus	4_Tx	4	37887	0.923856	1	1
Average CT	E069	Brain Cingulate Gyrus	11_BivFlnk	0	5668	0	1	1
Average CT	E069	Brain Cingulate Gyrus	12_EnhBiv	0	4410	0	1	1
Average CT	E069	Brain Cingulate Gyrus	3_TxFlnk	0	837	0	1	1
Average CT	E069	Brain Cingulate Gyrus	6_EnhG	0	6199	0	1	1
Average CT	E069	Brain Cingulate Gyrus	8_ZNF/Rpts	0	769	0	1	1
Average CT	E069	Brain Cingulate Gyrus	9_Het	0	2098	0	1	1
Average CT	E070	Brain Germinal Matrix	5_TxWk	8	76000	0.921209	1	1
Average CT	E070	Brain Germinal Matrix	3_TxFlnk	0	1559	0	1	1
Average CT	E070	Brain Germinal Matrix	6_EnhG	0	3742	0	1	1
Average CT	E070	Brain Germinal Matrix	8_ZNF/Rpts	0	2331	0	1	1
Average CT	E070	Brain Germinal Matrix	9_Het	0	4928	0	1	1
Average CT	E071	Brain Hippocampus Middle	7_Enh	5	51286	0.853165	1	1
Average CT	E071	Brain Hippocampus Middle	12_EnhBiv	0	6236	0	1	1
Average CT	E071	Brain Hippocampus Middle	3_TxFlnk	0	1053	0	1	1
Average CT	E071	Brain Hippocampus Middle	8_ZNF/Rpts	0	1009	0	1	1
Average CT	E072	Brain Inferior Temporal Lobe	11_BivFlnk	0	4923	0	1	1
Average CT	E072	Brain Inferior Temporal Lobe	12_EnhBiv	0	3547	0	1	1
Average CT	E072	Brain Inferior Temporal Lobe	3_TxFlnk	0	937	0	1	1
Average CT	E072	Brain Inferior Temporal Lobe	8_ZNF/Rpts	0	971	0	1	1
Average CT	E073	Brain Dorsolateral Prefrontal Cortex	11_BivFlnk	0	3764	0	1	1
Average CT	E073	Brain Dorsolateral Prefrontal Cortex	3_TxFlnk	0	971	0	1	1
Average CT	E073	Brain Dorsolateral Prefrontal Cortex	6_EnhG	0	6521	0	1	1
Average CT	E073	Brain Dorsolateral Prefrontal Cortex	8_ZNF/Rpts	0	806	0	1	1
Average CT	E074	Brain Substantia Nigra	15_Quies	22	193545	0.994689	1	1
Average CT	E074	Brain Substantia Nigra	4_Tx	3	31365	0.836995	1	1
Average CT	E074	Brain Substantia Nigra	10_TssBiv	0	5350	0	1	1
Average CT	E074	Brain Substantia Nigra	11_BivFlnk	0	2654	0	1	1
Average CT	E074	Brain Substantia Nigra	12_EnhBiv	0	3629	0	1	1
Average CT	E074	Brain Substantia Nigra	3_TxFlnk	0	606	0	1	1
Average CT	E074	Brain Substantia Nigra	6_EnhG	0	4602	0	1	1
Average CT	E074	Brain Substantia Nigra	8_ZNF/Rpts	0	840	0	1	1
Average CT	E074	Brain Substantia Nigra	9_Het	0	2181	0	1	1
Average CT	E081	Fetal Brain Male	11_BivFlnk	0	4668	0	1	1
Average CT	E081	Fetal Brain Male	3_TxFlnk	0	227	0	1	1
Average CT	E081	Fetal Brain Male	4_Tx	0	7916	0	1	1
Average CT	E081	Fetal Brain Male	6_EnhG	0	689	0	1	1
Average CT	E081	Fetal Brain Male	8_ZNF/Rpts	0	6462	0	1	1
Average CT	E081	Fetal Brain Male	9_Het	0	3398	0	1	1
Average CT	E082	Fetal Brain Female	11_BivFlnk	1	10598	0.825658	1	1
Average CT	E082	Fetal Brain Female	13_ReprPC	3	30447	0.862186	1	1
Average CT	E082	Fetal Brain Female	5_TxWk	9	80493	0.978382	1	1
Average CT	E082	Fetal Brain Female	3_TxFlnk	0	1634	0	1	1
Average CT	E082	Fetal Brain Female	6_EnhG	0	3371	0	1	1
Average CT	E082	Fetal Brain Female	8_ZNF/Rpts	0	2076	0	1	1
Average CT	E082	Fetal Brain Female	9_Het	0	4725	0	1	1
Total SA	E067	Brain Angular Gyrus	13_ReprPC	1	15832	0.722766	1	1
Total SA	E067	Brain Angular Gyrus	14_ReprPCWk	4	49333	0.927803	1	1
Total SA	E067	Brain Angular Gyrus	11_BivFlnk	0	1829	0	1	1
Total SA	E067	Brain Angular Gyrus	3_TxFlnk	0	452	0	1	1
Total SA	E067	Brain Angular Gyrus	8_ZNF/Rpts	0	591	0	1	1
Total SA	E067	Brain Angular Gyrus	9_Het	0	1606	0	1	1
Total SA	E068	Brain Anterior Caudate	1_TssA	10	122196	0.936475	1	1
Total SA	E068	Brain Anterior Caudate	5_TxWk	8	95378	0.959831	1	1
Total SA	E068	Brain Anterior Caudate	7_Enh	4	46810	0.977855	1	1
Total SA	E068	Brain Anterior Caudate	10_TssBiv	0	7727	0	1	1
Total SA	E068	Brain Anterior Caudate	12_EnhBiv	0	2558	0	1	1
Total SA	E068	Brain Anterior Caudate	8_ZNF/Rpts	0	932	0	1	1
Total SA	E068	Brain Anterior Caudate	9_Het	0	2723	0	1	1
Total SA	E069	Brain Cingulate Gyrus	13_ReprPC	1	20376	0.561592	1	1
Total SA	E069	Brain Cingulate Gyrus	3_TxFlnk	0	837	0	1	1
Total SA	E069	Brain Cingulate Gyrus	8_ZNF/Rpts	0	769	0	1	1
Total SA	E069	Brain Cingulate Gyrus	9_Het	0	2098	0	1	1
Total SA	E070	Brain Germinal Matrix	5_TxWk	6	76000	0.903493	1	1
Total SA	E070	Brain Germinal Matrix	7_Enh	2	33507	0.683096	1	1
Total SA	E070	Brain Germinal Matrix	3_TxFlnk	0	1559	0	1	1
Total SA	E070	Brain Germinal Matrix	8_ZNF/Rpts	0	2331	0	1	1
Total SA	E071	Brain Hippocampus Middle	13_ReprPC	1	17502	0.653853	1	1
Total SA	E071	Brain Hippocampus Middle	5_TxWk	7	84797	0.944681	1	1
Total SA	E071	Brain Hippocampus Middle	12_EnhBiv	0	6236	0	1	1
Total SA	E071	Brain Hippocampus Middle	3_TxFlnk	0	1053	0	1	1
Total SA	E071	Brain Hippocampus Middle	8_ZNF/Rpts	0	1009	0	1	1
Total SA	E071	Brain Hippocampus Middle	9_Het	0	2767	0	1	1
Total SA	E072	Brain Inferior Temporal Lobe	13_ReprPC	1	16707	0.684937	1	1
Total SA	E072	Brain Inferior Temporal Lobe	11_BivFlnk	0	4923	0	1	1
Total SA	E072	Brain Inferior Temporal Lobe	12_EnhBiv	0	3547	0	1	1
Total SA	E072	Brain Inferior Temporal Lobe	3_TxFlnk	0	937	0	1	1
Total SA	E072	Brain Inferior Temporal Lobe	8_ZNF/Rpts	0	971	0	1	1
Total SA	E073	Brain Dorsolateral Prefrontal Cortex	11_BivFlnk	0	3764	0	1	1
Total SA	E073	Brain Dorsolateral Prefrontal Cortex	12_EnhBiv	0	3393	0	1	1
Total SA	E073	Brain Dorsolateral Prefrontal Cortex	3_TxFlnk	0	971	0	1	1
Total SA	E073	Brain Dorsolateral Prefrontal Cortex	8_ZNF/Rpts	0	806	0	1	1
Total SA	E073	Brain Dorsolateral Prefrontal Cortex	9_Het	0	2356	0	1	1
Total SA	E074	Brain Substantia Nigra	15_Quies	17	193545	1.00512	1	1
Total SA	E074	Brain Substantia Nigra	2_TssAFlnk	2	25178	0.908994	1	1
Total SA	E074	Brain Substantia Nigra	5_TxWk	8	94467	0.969086	1	1
Total SA	E074	Brain Substantia Nigra	11_BivFlnk	0	2654	0	1	1
Total SA	E074	Brain Substantia Nigra	3_TxFlnk	0	606	0	1	1
Total SA	E074	Brain Substantia Nigra	8_ZNF/Rpts	0	840	0	1	1
Total SA	E074	Brain Substantia Nigra	9_Het	0	2181	0	1	1
Total SA	E081	Fetal Brain Male	7_Enh	6	68201	1.00677	1	1
Total SA	E081	Fetal Brain Male	10_TssBiv	0	2559	0	1	1
Total SA	E081	Fetal Brain Male	3_TxFlnk	0	227	0	1	1
Total SA	E081	Fetal Brain Male	4_Tx	0	7916	0	1	1
Total SA	E081	Fetal Brain Male	9_Het	0	3398	0	1	1
Total SA	E082	Fetal Brain Female	2_TssAFlnk	2	25283	0.905172	1	1
Total SA	E082	Fetal Brain Female	4_Tx	4	53265	0.859306	1	1
Total SA	E082	Fetal Brain Female	7_Enh	2	26627	0.859483	1	1
Total SA	E082	Fetal Brain Female	3_TxFlnk	0	1634	0	1	1
Total SA	E082	Fetal Brain Female	8_ZNF/Rpts	0	2076	0	1	1
Total SA	E082	Fetal Brain Female	9_Het	0	4725	0	1	1

## Sheet: Table S9
Table S9. Histone modification enrichment of CpGs associated with average CT and total SA (P < 1 × 10-5; NCT-associated CpGs = 68; NSA-associated CpGs = 52) across 10 brain tissues. Data included 11 histone marks from the Roadmap Epigenomics Project. Enrichment and significance were calculated using hypergeometric test, with FDR-adjudted P-values computed within each tissue.
Phenotype	EIDs	Tissue	Modification	Observed	Background	Odd ratio	p-value	PFDR
Average CT	E073	Brain Dorsolateral Prefrontal Cortex	H3K4me1	24	233574	3.05603	3.34904e-05	0.000234433
Average CT	E068	Brain Anterior Caudate	H3K4me1	23	279170	2.46089	0.0006876	0.0048132
Average CT	E067	Brain Angular Gyrus	H3K4me1	19	240448	2.28645	0.00301203	0.0210842
Total SA	E070	Brain Germinal Matrix	H3K27me3	14	133033	2.31989	0.00873596	0.0436798
Average CT	E082	Fetal Brain Female	H3K4me1	15	167821	2.13112	0.0111804	0.0894428
Average CT	E067	Brain Angular Gyrus	H3K27ac	24	171919	1.63276	0.0384986	0.134745
Average CT	E081	Fetal Brain Male	H3K4me1	22	160613	1.75928	0.0234144	0.187315
Average CT	E072	Brain Inferior Temporal Lobe	H3K4me1	15	211864	1.88968	0.0269634	0.188744
Total SA	E082	Fetal Brain Female	H3K27me3	10	118025	2.1435	0.0314708	0.188825
Average CT	E071	Brain Hippocampus Middle	H3K4me1	23	226091	1.6619	0.0351443	0.210866
Average CT	E074	Brain Substantia Nigra	H3K4me1	16	266887	1.73903	0.0424928	0.297449
Average CT	E073	Brain Dorsolateral Prefrontal Cortex	H3K27ac	25	206746	1.45475	0.0883277	0.309147
Average CT	E071	Brain Hippocampus Middle	H3K9me3	2	136401	3.75229	0.103534	0.310602
Total SA	E069	Brain Cingulate Gyrus	H3K4me1	14	263124	1.82052	0.0451461	0.316023
Average CT	E070	Brain Germinal Matrix	H3K4me1	9	107076	1.9018	0.0637692	0.318846
Average CT	E074	Brain Substantia Nigra	H3K27ac	22	158727	1.29685	0.191013	0.361496
Average CT	E074	Brain Substantia Nigra	H3K27me3	5	137200	1.63505	0.206569	0.361496
Average CT	E074	Brain Substantia Nigra	H3K9ac	18	124481	1.3883	0.147412	0.361496
Total SA	E071	Brain Hippocampus Middle	H3K27me3	8	129482	1.5718	0.166462	0.370738
Total SA	E071	Brain Hippocampus Middle	H3K4me1	16	226091	1.44509	0.143117	0.370738
Total SA	E071	Brain Hippocampus Middle	H3K4me3	19	77143	1.34858	0.185369	0.370738
Average CT	E067	Brain Angular Gyrus	H3K27me3	6	102064	1.45628	0.248816	0.446594
Average CT	E067	Brain Angular Gyrus	H3K9ac	18	146291	1.24137	0.255197	0.446594
Total SA	E067	Brain Angular Gyrus	H3K4me1	12	240448	1.76887	0.0656451	0.459516
Average CT	E074	Brain Substantia Nigra	H3K9me3	1	150450	2.54136	0.328529	0.459941
Average CT	E068	Brain Anterior Caudate	H3K27ac	24	214754	1.31378	0.171632	0.464496
Average CT	E068	Brain Anterior Caudate	H3K9ac	20	183820	1.29669	0.19907	0.464496
Total SA	E067	Brain Angular Gyrus	H3K27ac	17	171919	1.45389	0.133761	0.468162
Total SA	E072	Brain Inferior Temporal Lobe	H3K4me1	11	211864	1.79137	0.0688999	0.482299
Total SA	E071	Brain Hippocampus Middle	H3K27ac	19	152192	1.17598	0.333827	0.50074
Average CT	E072	Brain Inferior Temporal Lobe	H3K27ac	23	177802	1.34727	0.151305	0.529568
Total SA	E069	Brain Cingulate Gyrus	H3K27ac	15	169807	1.13258	0.392563	0.571871
Total SA	E069	Brain Cingulate Gyrus	H3K27me3	5	78312	1.51523	0.254084	0.571871
Total SA	E069	Brain Cingulate Gyrus	H3K4me3	15	79844	1.07672	0.456466	0.571871
Total SA	E069	Brain Cingulate Gyrus	H3K9ac	13	133030	1.05206	0.490176	0.571871
Total SA	E069	Brain Cingulate Gyrus	H3K9me3	1	114537	3.57736	0.24749	0.571871
Average CT	E071	Brain Hippocampus Middle	H3K27ac	25	152192	1.1875	0.28609	0.57218
Average CT	E069	Brain Cingulate Gyrus	H3K27ac	21	169807	1.24831	0.235907	0.574986
Average CT	E069	Brain Cingulate Gyrus	H3K4me1	14	263124	1.28107	0.246422	0.574986
Average CT	E069	Brain Cingulate Gyrus	H3K9ac	20	133030	1.3151	0.185137	0.574986
Average CT	E068	Brain Anterior Caudate	H3K27me3	3	52316	1.45637	0.347716	0.608503
Total SA	E081	Fetal Brain Male	H3K27me3	7	82346	1.55843	0.189432	0.619808
Total SA	E081	Fetal Brain Male	H3K4me1	14	160613	1.35517	0.206603	0.619808
Average CT	E072	Brain Inferior Temporal Lobe	H3K9ac	20	165266	1.20296	0.283813	0.662229
Total SA	E068	Brain Anterior Caudate	H3K4me1	13	279170	1.60473	0.0993185	0.69523
Average CT	E073	Brain Dorsolateral Prefrontal Cortex	H3K9ac	16	108407	1.12604	0.384558	0.697013
Average CT	E073	Brain Dorsolateral Prefrontal Cortex	H3K9me3	1	139328	1.99083	0.398293	0.697013
Total SA	E068	Brain Anterior Caudate	H3K27ac	18	214754	1.27514	0.243759	0.738547
Total SA	E068	Brain Anterior Caudate	H3K4me3	17	90012	1.19871	0.31652	0.738547
Average CT	E071	Brain Hippocampus Middle	H3K27me3	7	129482	0.992001	0.566374	0.772062
Average CT	E071	Brain Hippocampus Middle	H3K36me3	6	193708	0.905106	0.652265	0.772062
Average CT	E071	Brain Hippocampus Middle	H3K4me3	18	77143	0.843169	0.772062	0.772062
Total SA	E082	Fetal Brain Female	H3K4me1	8	167821	1.36896	0.261134	0.783402
Total SA	E069	Brain Cingulate Gyrus	H3K36me3	3	210244	0.708716	0.792984	0.792984
Average CT	E073	Brain Dorsolateral Prefrontal Cortex	H3K27me3	5	123494	0.975765	0.586929	0.799705
Average CT	E073	Brain Dorsolateral Prefrontal Cortex	H3K36me3	4	202211	0.733173	0.791218	0.799705
Average CT	E073	Brain Dorsolateral Prefrontal Cortex	H3K4me3	16	75912	0.816443	0.799705	0.799705
Total SA	E073	Brain Dorsolateral Prefrontal Cortex	H3K27ac	15	206746	1.01435	0.533794	0.806256
Total SA	E073	Brain Dorsolateral Prefrontal Cortex	H3K27me3	4	123494	1.02456	0.556161	0.806256
Total SA	E073	Brain Dorsolateral Prefrontal Cortex	H3K4me1	8	233574	1.0185	0.539994	0.806256
Total SA	E073	Brain Dorsolateral Prefrontal Cortex	H3K4me3	15	75912	1.07575	0.457629	0.806256
Total SA	E073	Brain Dorsolateral Prefrontal Cortex	H3K9ac	11	108407	0.981811	0.575897	0.806256
Total SA	E072	Brain Inferior Temporal Lobe	H3K27ac	15	177802	1.06861	0.466198	0.818311
Total SA	E072	Brain Inferior Temporal Lobe	H3K27me3	3	109795	0.840417	0.694657	0.818311
Total SA	E072	Brain Inferior Temporal Lobe	H3K36me3	5	221931	1.1066	0.484187	0.818311
Total SA	E072	Brain Inferior Temporal Lobe	H3K4me3	13	82184	0.863061	0.725674	0.818311
Total SA	E072	Brain Inferior Temporal Lobe	H3K9ac	11	165266	0.774542	0.818311	0.818311
Total SA	E072	Brain Inferior Temporal Lobe	H3K9me3	1	143889	2.3775	0.347629	0.818311
Total SA	E067	Brain Angular Gyrus	H3K27me3	3	102064	0.921274	0.636677	0.851894
Total SA	E067	Brain Angular Gyrus	H3K36me3	3	195831	0.883883	0.663121	0.851894
Total SA	E067	Brain Angular Gyrus	H3K4me3	12	70981	0.856382	0.730195	0.851894
Total SA	E067	Brain Angular Gyrus	H3K9ac	12	146291	1.03445	0.512883	0.851894
Average CT	E068	Brain Anterior Caudate	H3K4me3	19	90012	0.956978	0.609815	0.853741
Total SA	E070	Brain Germinal Matrix	H3K4me1	5	107076	1.32617	0.342998	0.857496
Average CT	E070	Brain Germinal Matrix	H3K27me3	7	133033	0.722497	0.840455	0.880424
Average CT	E070	Brain Germinal Matrix	H3K36me3	3	132996	0.719492	0.785089	0.880424
Average CT	E070	Brain Germinal Matrix	H3K4me3	14	41887	0.735355	0.880424	0.880424
Average CT	E070	Brain Germinal Matrix	H3K9me3	1	240710	1.12471	0.592013	0.880424
Total SA	E068	Brain Anterior Caudate	H3K9ac	13	183820	1.03732	0.507646	0.888381
Total SA	E071	Brain Hippocampus Middle	H3K36me3	4	193708	0.779367	0.752395	0.902874
Total SA	E082	Fetal Brain Female	H3K36me3	5	205436	1.13506	0.463404	0.926807
Average CT	E074	Brain Substantia Nigra	H3K36me3	1	154109	0.316064	0.956612	0.956612
Average CT	E074	Brain Substantia Nigra	H3K4me3	13	90313	0.730784	0.879588	0.956612
Total SA	E068	Brain Anterior Caudate	H3K27me3	1	52316	0.618678	0.802591	0.963678
Total SA	E068	Brain Anterior Caudate	H3K36me3	3	230989	0.664116	0.82601	0.963678
Average CT	E067	Brain Angular Gyrus	H3K36me3	3	195831	0.666281	0.824913	1
Average CT	E067	Brain Angular Gyrus	H3K4me3	11	70981	0.550835	0.980309	1
Average CT	E067	Brain Angular Gyrus	H3K9me3	0	97798	0	1	1
Average CT	E068	Brain Anterior Caudate	H3K36me3	3	230989	0.500624	0.933777	1
Average CT	E068	Brain Anterior Caudate	H3K9me3	0	193515	0	1	1
Average CT	E069	Brain Cingulate Gyrus	H3K27me3	3	78312	0.657313	0.831507	1
Average CT	E069	Brain Cingulate Gyrus	H3K36me3	2	210244	0.350772	0.975437	1
Average CT	E069	Brain Cingulate Gyrus	H3K4me3	14	79844	0.688559	0.920854	1
Average CT	E069	Brain Cingulate Gyrus	H3K9me3	0	114537	0	1	1
Average CT	E072	Brain Inferior Temporal Lobe	H3K27me3	4	109795	0.857924	0.686352	1
Average CT	E072	Brain Inferior Temporal Lobe	H3K36me3	3	221931	0.480082	0.944358	1
Average CT	E072	Brain Inferior Temporal Lobe	H3K4me3	12	82184	0.554786	0.981871	1
Average CT	E072	Brain Inferior Temporal Lobe	H3K9me3	0	143889	0	1	1
Average CT	E081	Fetal Brain Male	DNase	3	206969	0.50378	0.932077	1
Average CT	E081	Fetal Brain Male	H3K27me3	7	82346	1.14964	0.422471	1
Average CT	E081	Fetal Brain Male	H3K36me3	0	55942	0	1	1
Average CT	E081	Fetal Brain Male	H3K4me3	3	47536	0.563857	0.896327	1
Average CT	E081	Fetal Brain Male	H3K9me3	0	24156	0	1	1
Average CT	E082	Fetal Brain Female	DNase	4	195059	0.652529	0.855864	1
Average CT	E082	Fetal Brain Female	H3K27me3	7	118025	1.03302	0.52635	1
Average CT	E082	Fetal Brain Female	H3K36me3	3	205436	0.492425	0.938103	1
Average CT	E082	Fetal Brain Female	H3K4me3	11	40859	0.516005	0.988883	1
Average CT	E082	Fetal Brain Female	H3K9me3	0	165884	0	1	1
Total SA	E067	Brain Angular Gyrus	H3K9me3	0	97798	0	1	1
Total SA	E068	Brain Anterior Caudate	H3K9me3	0	193515	0	1	1
Total SA	E070	Brain Germinal Matrix	H3K36me3	2	132996	0.623554	0.82901	1
Total SA	E070	Brain Germinal Matrix	H3K4me3	10	41887	0.675335	0.903408	1
Total SA	E070	Brain Germinal Matrix	H3K9me3	0	240710	0	1	1
Total SA	E071	Brain Hippocampus Middle	H3K9me3	0	136401	0	1	1
Total SA	E073	Brain Dorsolateral Prefrontal Cortex	H3K36me3	2	202211	0.469236	0.922805	1
Total SA	E073	Brain Dorsolateral Prefrontal Cortex	H3K9me3	0	139328	0	1	1
Total SA	E074	Brain Substantia Nigra	H3K27ac	14	158727	0.998975	0.553909	1
Total SA	E074	Brain Substantia Nigra	H3K27me3	1	137200	0.403908	0.914989	1
Total SA	E074	Brain Substantia Nigra	H3K36me3	1	154109	0.415233	0.909217	1
Total SA	E074	Brain Substantia Nigra	H3K4me1	10	266887	1.34561	0.248663	1
Total SA	E074	Brain Substantia Nigra	H3K4me3	12	90313	0.927546	0.64263	1
Total SA	E074	Brain Substantia Nigra	H3K9ac	10	124481	0.918154	0.64989	1
Total SA	E074	Brain Substantia Nigra	H3K9me3	0	150450	0	1	1
Total SA	E081	Fetal Brain Male	DNase	3	206969	0.668303	0.822949	1
Total SA	E081	Fetal Brain Male	H3K36me3	0	55942	0	1	1
Total SA	E081	Fetal Brain Male	H3K4me3	3	47536	0.748017	0.763525	1
Total SA	E081	Fetal Brain Male	H3K9me3	0	24156	0	1	1
Total SA	E082	Fetal Brain Female	DNase	3	195059	0.639217	0.844009	1
Total SA	E082	Fetal Brain Female	H3K4me3	12	40859	0.802219	0.793555	1
Total SA	E082	Fetal Brain Female	H3K9me3	0	165884	0	1	1

[truncated: 10 more sheets: Table S10, Table S11, Table S12, Table S13, Table S14, Table S15, Table S16, Table S17, Table S18, Table S19]
